1 **Optogenetic modulation of TDP-43 oligomerization fast-forwards ALS-related**  
2 **pathologies in the spinal motor neurons**

3

4

5 **Kazuhide Asakawa<sup>1,2,3,\*</sup>, Hiroshi Handa<sup>1</sup>, Koichi Kawakami<sup>2,3,\*</sup>**

6

7 <sup>1</sup> Department of Nanoparticle Translational Research, Tokyo Medical University,  
8 Shinjuku, 160-8402, Japan

9 <sup>2</sup> Division of Molecular and Developmental Biology, National Institute of Genetics,  
10 1111 Yata, Mishima, Shizuoka, Japan, 411-8540

11 <sup>3</sup> Department of Genetics, Graduate University for Advanced Studies (SOKENDAI),  
12 1111 Yata, Mishima, Shizuoka, Japan, 411-8540

13 \* Corresponding authors

14

15

16 Corresponding authors

17 Kazuhide Asakawa (Email: [kasakawa@nig.ac.jp](mailto:kasakawa@nig.ac.jp))

18 Koichi Kawakami (Email: [kokawaka@nig.ac.jp](mailto:kokawaka@nig.ac.jp))

19 **Abstract**

20 Cytoplasmic aggregation of TDP-43 characterizes degenerating neurons in most cases  
21 of amyotrophic lateral sclerosis (ALS), yet the mechanisms and cellular outcomes of  
22 TDP-43 pathology remain largely elusive. Here, we develop an optogenetic TDP-43  
23 variant (opTDP-43), whose multimerization status can be modulated *in vivo* through  
24 external light illumination. Using the translucent zebrafish neuromuscular system, we  
25 demonstrate that short-term light stimulation reversibly induces cytoplasmic opTDP-43  
26 mislocalization, but not aggregation, in the spinal motor neuron, leading to an axon  
27 outgrowth defect associated with myofiber denervation. In contrast, opTDP-43 forms  
28 pathological aggregates in the cytoplasm after longer-term illumination and seeds  
29 non-optogenetic TDP-43 aggregation. Furthermore, we find that an ALS-linked  
30 mutation in the intrinsically disordered region (IDR) exacerbates the light-dependent  
31 opTDP-43 toxicity on locomotor behavior. Together, our results propose that  
32 IDR-mediated TDP-43 oligomerization triggers both acute and long-term pathologies of  
33 motor neurons, which may be relevant to the pathogenesis and progression of ALS.

## 34 **Introduction**

35 Amyotrophic lateral sclerosis (ALS) is a neurological disorder in which the upper and  
36 lower motor neurons progressively degenerate, leading to muscular atrophy and  
37 eventually fatal paralysis. Trans-activation response element (TAR) DNA-binding  
38 protein 43 (TDP-43), a heterogeneous nuclear ribonucleoprotein, is mislocalized to the  
39 cytoplasm and forms pathological aggregates in the degenerating motor neurons in ALS  
40 <sup>1, 2</sup>. TDP-43 aggregation characterizes almost all cases of sporadic ALS <sup>3, 4</sup>, which  
41 accounts for greater than 90% of ALS. Moreover, mutations in the *TARDBP* gene  
42 encoding TDP-43 are linked to certain fraction (~ 4 %) of familial ALS <sup>5</sup>. Despite its  
43 correlation with and causation of ALS, the role of TDP-43 in ALS pathogenesis has  
44 been largely unknown at the mechanistic level.

45         Multimerization of TDP-43 underlies its physiological and pathological roles.  
46 Under normal physiological conditions, homo-oligomerization of TDP-43 occurs  
47 through its N-terminal domain and is necessary for its RNA regulatory functions, such  
48 as splicing <sup>6-8</sup>. At the C-terminus TDP-43 contains an intrinsically disordered region  
49 (IDR) with prion-like glutamine/asparagine-rich (Q/N) and glycine-rich regions, which  
50 can undergo liquid-liquid phase separation (LLPS) to form dynamic protein droplets <sup>9</sup>.  
51 The TDP-43 IDR mutations that are linked to familial ALS cases enhance intrinsic  
52 aggregation propensity and protein stability of TDP-43 <sup>10 11</sup> and result in altered phase  
53 separation <sup>9</sup>, which could contribute to disease propagation through acceleration of the  
54 formation and accumulation of pathological aggregates <sup>12, 13 14</sup>. The modular architecture  
55 of TDP-43 has led to several hypotheses that its N-terminus-dependent oligomerization  
56 modulates C-terminal IDR-mediated aggregation either by enhancing <sup>9</sup> or hindering  
57 IDR interactions between adjacent TDP-43 molecules <sup>6 15</sup>.

58         The severity of TDP-43 toxicity is correlated with the levels of wild-type and  
59 mutant TDP-43 expression in the various cellular and animal models <sup>16-25</sup>. However,  
60 cytoplasmic TDP-43 aggregation is not always detectable in these models. Moreover, in  
61 a certain type of degenerating upper motor neurons, loss of nuclear TDP-43 can occur

62 without the accumulation of cytoplasmic aggregates<sup>26</sup>. Therefore, it has been difficult to  
63 evaluate how TDP-43 aggregation contributes to TDP-43 toxicity. Under these  
64 circumstances, it is necessary to develop a system to induce TDP-43 aggregation  
65 conditionally. Recently, light-dependent aggregation of *Arabidopsis* cryptochrome-2  
66 was applied to the formation of IDR droplets via LLPS in a light  
67 illumination-dependent manner<sup>27</sup>. This optogenetic approach has been successfully  
68 extended to the induction of cytotoxic TDP-43 aggregates formation in cultured cells<sup>28</sup>,  
69<sup>29</sup>. However, interconversion of normal and toxic TDP-43 forms with spatiotemporal  
70 precision has not been achieved in animal models yet, which is central for the  
71 understanding of TDP-43 toxicity *in vivo*.

72 In the present study, we develop an optogenetic TDP-43 variant (opTDP-43)  
73 carrying a light-dependent oligomerization module of cryptochrome-2 attached to the  
74 IDR, and analyze the mechanisms of TDP-43 toxicity in spinal motor neurons *in vivo*.  
75 Transgenic expression and light stimulation of opTDP-43 in transparent zebrafish larvae  
76 show that oligomerization and aggregation of opTDP-43 is inducible and tunable by  
77 external light illumination *in vivo*. We reveal that, in the spinal motor neurons,  
78 short-term light illumination reversibly increases the cytoplasmic opTDP-43 pool and  
79 elevates myofiber denervation frequency in the absence of distinct aggregate formation.  
80 Furthermore, longer chronic light stimulation eventually leads to accumulation of  
81 cytoplasmic opTDP-43 aggregates that further seed aggregation of non-optogenetic  
82 TDP-43, which is accompanied by motor decline. The sequential pathological  
83 alterations of spinal motor neurons triggered by opTDP-43 oligomerization may provide  
84 clues about how motor neuron degeneration progresses at both molecular and cellular  
85 levels in a prodromal phase of ALS.

## 86 **Results**

### 87 **Overexpression of TDP-43 causes cytoplasmic aggregation-independent toxicity in** 88 **the spinal motor neurons**

89 To explore mechanisms of TDP-43 toxicity associated with its cytoplasmic aggregation  
90 in spinal motor neurons, we first aimed to induce TDP-43 aggregation by its  
91 overexpression in the caudal primary motor neurons (CaPs) of zebrafish, which  
92 innervate a ventral third of the myotome and are present uniquely in every spinal  
93 hemisegment (Figure 1A, B)<sup>30</sup>. We generated a Gal4-inducible transgene of the  
94 zebrafish *tardbp*, encoding one of the two zebrafish TDP-43 paralogues, tagged with  
95 mRFP1 at its N-terminus (mRFP1-TDP-43z) (Figure 1C). To test the functionality of  
96 mRFP1-TDP-43z as TDP-43, we generated knock-out (KO) alleles for both *tardbp* and  
97 its paralogue *tardbpl* with the CRISPR-Cas9 system (i.e. *tardbp-n115* and *tardbpl-n94*,  
98 respectively). The TDP-43 double knock-out (DKO) embryos exhibited a blood  
99 circulation defect at 24-48 hours post-fertilization (hpf) (Sup. Figure 1D) and were  
100 lethal<sup>31</sup>. We injected mRNA encoding wild-type Tardbp and mRFP1-TDP-43z into the  
101 TDP-43 DKO embryos at the one-cell stage (Sup. Figure 1A, B, C) and found that the  
102 mutant phenotype was rescued by both, indicating that mRFP1-TDP-43 is functional  
103 (Sup. Figure 1E). We then overexpressed mRFP1-TDP-43z in CaPs by combining  
104 Tg[UAS:mRFP1-TDP-43z] with the Tg[SAIG213A] driver (Figure 1A, B)<sup>32</sup>, and  
105 analyzed their muscle innervation. The mRFP-TDP-43z overexpression significantly  
106 reduced the total axonal length at 48 hpf (Figure 1C, D, E, Sup Movie 1), while the  
107 axon arborized within the inherent innervation territory of the ventral myotomes (Figure  
108 1C, D) and their branching frequency (i.e. branching as calculated per total axon length)  
109 were comparable to that of the wild-type CaP (Figure 1F), showing that overexpression  
110 of mRFP-TDP-43z primarily affects axon outgrowth, but not pathfinding or branching.  
111 However, the overexpressed mRFP-TDP-43z was predominantly accumulated in the  
112 nucleus and cytoplasmic aggregation was undetectable in the CaP at 48 hpf (Figure 1G).

113 These observations suggest that an elevated level of TDP-43 causes neurotoxicity  
114 independently of cytoplasmic aggregation in the spinal motor neurons.

115

### 116 **A photo-switchable TDP-43: opTDP-43**

117 Next, we developed an alternative strategy to induce cytoplasmic TDP-43 aggregation.  
118 The IDR at the C-terminal of TDP-43 has a high propensity to form aggregates<sup>10</sup>.  
119 Therefore, we reasoned that cytoplasmic TDP-43 aggregation might effectively occur  
120 when the proximity between IDRs was increased by addition of an exogenous  
121 multimerization tag, such as *Arabidopsis* cryptochrome CRY2. We first tested the  
122 feasibility of CRY2 oligomerization in spinal motor neurons *in vivo* via external light  
123 illumination. We created a transgenic zebrafish line carrying a fusion of mRFP1 and  
124 CRY2olig, a point mutant version of CRY2 (E490G) that exhibits significant clustering  
125 upon blue light illumination<sup>33</sup>, under the UAS sequence (Figure 2A;  
126 Tg[UAS:mRFP1-CRY2olig]). In Tg[SAIG213A] Tg[UAS:mRFP1-CRY2olig] double  
127 transgenic embryos raised under dark conditions, mRFP1-CRY2olig was dispersed  
128 throughout the CaPs at 30 hpf (Figure 2B). Upon blue light illumination via confocal  
129 laser scanning of entire CaPs, mRFP1-CRY2olig instantaneously clustered in somas  
130 and axons during the first 10 min of illumination (Figure 2B, Sup Movie 2). Once  
131 illumination ceased, the mRFP1-CRY2olig clusters gradually disappeared and a  
132 homogeneous distribution of mRFP1-CRY2olig was restored (Figure 2B), showing that  
133 CRY2olig clustering is rapidly and reversibly controllable by light in the spinal motor  
134 neurons *in vivo*.

135 To adopt the clustering capacity of mRFP1-CRY2olig to TDP-43, we inserted  
136 the zebrafish *tardbp* between the mRFP1 and CRY2olig modules, and designated the  
137 resulting mRFP1-*tardbp*-CRY2olig fusion gene as opTDP-43z (i.e. optogenetic TDP-43  
138 of zebrafish) (Figure 2A). The resulting opTDP-43z rescued the blood circulation defect  
139 of TDP-43DKO embryos under dark conditions as efficiently as wild-type *tardbp* (Sup  
140 Figure 1E), confirming that opTDP-43z is functional. We first assessed the

141 oligomerization capacity of optTDP-43z in the skeletal muscle cells by taking  
142 advantage of their relatively large nucleus and cytoplasm. Since the strong whole body  
143 expression of mRFP-TDP-43z driven by the ubiquitous Gal4 driver Tg[SAGFF73A]  
144 perturbed development (Sup. Figure 2), we generated a UAS transgenic line that  
145 expressed a tolerable level of opTDP-43z with the Tg[SAGFF73A] driver (Figure 2A;  
146 Tg[UAS:opTDP-43z]). Unlike mRFP1-CRY2olig, opTDP-43z predominantly localized  
147 to the nucleus of the skeletal muscle cells under dark conditions (Figure 2C), suggesting  
148 that opTDP-43z localization is regulated by TDP-43-dependent mechanisms. We found  
149 that, while the nuclear-enriched opTDP-43z localization persisted during the 3.5 hours  
150 of blue light illumination (28-31.5 hpf), the cytoplasmic opTDP-43z gradually increased  
151 (Figure 2C, Sup Movie 3) and opTDP-43z droplets appeared 60-90 min after the  
152 initiation of illumination (Figure 2C, D). On the other hand, the nuclear opTDP-43z  
153 signal decreased slightly but significantly over time during the illumination (Figure 2E).  
154 We also found that the cytoplasmic opTDP-43z droplets were partially ubiquitinated as  
155 shown by immunofluorescence (Figure 2F), suggesting that the opTDP-43z level is  
156 regulated by proteolysis<sup>34, 35</sup>. Altogether, these observations demonstrate that  
157 opTDP-43z is a photo-switchable variant of TDP-43 that forms aggregates in a blue  
158 light illumination-dependent manner.

159

### 160 **Light stimulation of opTDP-43z promotes cytoplasmic mislocalization in neuronal** 161 **cells**

162 To investigate light responsiveness of opTDP-43z in neuronal cells, we expressed  
163 opTDP-43z in both spinal motor neurons and tactile sensing Rohon-Beard (RB) cells by  
164 combining both Tg[mnr2b-hs:Gal4]<sup>36</sup> and Tg[SAIG213A] drivers. Under dark  
165 conditions, opTDP-43z primarily localized to the nucleus of both cell types at 28 hpf in  
166 Tg[mnr2b-hs:Gal4] Tg[SAIG213A] Tg[UAS:opTDP-43z] Tg[UAS:EGFP] quadruple  
167 transgenic fish (Figure 3A). Upon blue light illumination of the spinal cord, the  
168 nuclear-enriched localization of opTDP-43z persisted for about 90 min in both spinal

169 motor neurons and RB cells, and then its localization was gradually expanded to the  
170 entire EGFP-positive area (Figure 3B C, Sup Movie 4), suggesting that light-dependent  
171 opTDP-43z oligomerization promotes its mislocalization to the cytoplasm.  
172 Unexpectedly, however, the cytoplasmic opTDP-43z mislocalization did not lead to  
173 distinct droplet formation as observed in the skeletal muscle cells within the time frames  
174 examined (up to 4.5 hours illumination), suggesting that the spinal motor neurons and  
175 RB cells have lower propensity to form opTDP-43 aggregates than the skeletal muscle  
176 cells. The cell type-dependent variation of opTDP-43 mislocalization and aggregation  
177 was also substantiated by the observations that neither embryonic epithelial cells nor  
178 differentiated skeletal muscle fibers displayed cytoplasmic mislocalization or  
179 aggregation of opTDP-43z under the same light illumination condition (Sup Figure 3).

180

### 181 **opTDP-43z oligomerization perturbs axon outgrowth**

182 To explore the impact of light-induced opTDP-43z mislocalization at the whole cell  
183 level, we restricted opTDP-43z expression to CaPs by using the Tg[SAIG213A] driver.  
184 We devised a protocol by which Tg[SAIG213A] Tg[UAS:EGFP] Tg[UAS:opTDP-43z]  
185 triple transgenic fish were raised under continuous dark conditions until 48 hpf except  
186 being illuminated for 3 hours during 28-31 hpf (Figure 4A). Under this paradigm,  
187 opTDP-43z was primarily localized within the nucleus at 28 hpf, then dispersed  
188 throughout the nucleus and cytoplasm upon illumination, and restored its  
189 nuclear-enriched localization at 48-50 hpf (Figure 4A, B). We found by morphological  
190 analyses that total axon length, but not branching frequency, of CaPs decreased at 48-50  
191 hpf by 13 % in the fish treated with 3 hours of blue light illumination, while such a  
192 phenotype was detected neither under continuous dark conditions nor by  
193 mRFP1-CRY2olig expression (Figure 4C, D, E). As observed with mRFP1-TDP-43z  
194 overexpression (Figure 1), the axons of light-stimulated CaPs expressing opTDP-43z  
195 arborized within their inherent ventral innervation territory (Figure 4C), and their  
196 branching frequency remained unchanged (Figure 4E), suggesting that the



197 light-dependent opTDP-43z toxicity primarily influences axon outgrowth, but not  
198 pathfinding or branching.

199 The absence of distinct cytoplasmic aggregate formation in the CaPs raises  
200 the possibility that opTDP-43z exerts its toxicity through dragging of non-optogenetic  
201 TDP-43 out of the nucleus to the cytoplasm. To test this possibility, we constructed  
202 Tg[mnr2b-hs:EGFP-TDP-43z] expressing EGFP-TDP-43z under the control of the  
203 mnr2b promoter, and established a Tg[SAIGFF213A] Tg[UAS:opTDP-43z]  
204 Tg[mnr2b-hs:EGFP-TDP-43z] triple transgenic fish. Under dark conditions at 28 hpf,  
205 both opTDP-43z and EGFP-TDP-43z exhibited nuclear localization with subnuclear  
206 distribution patterns similar to each other (Figure 4I). Contrary to our prediction,  
207 however, the nuclear-enriched EGFP-TDP-43z localization remained unaffected while  
208 opTDP-43z was dispersed throughout the soma with 4 hour-blue light illumination  
209 during 28-32 hpf (Figure 4I-K), demonstrating that light-induced opTDP-43z  
210 mislocalization occurs independently of the non-optogenetic TDP-43 pool. These  
211 observations suggest that the perturbation of axon outgrowth by light-stimulated  
212 opTDP-43z is unlikely to be caused by loss of TDP-43 function due to nuclear TDP-43  
213 reduction or depletion.

214

### 215 **Light-stimulated opTDP-43z elevates myofiber denervation frequency**

216 The opTDP-43z-mediated axon outgrowth defects raised the question as to whether  
217 opTDP-43z perturbs axon extension or promotes axon shrinkage, or both. To address  
218 this, we analyzed a major axon collateral of CaP innervating the dorsal side of its  
219 innervation territory that had experienced tertial branching at 56 hpf (provisionally  
220 named *dorsal axon collateral of CaP with tertial branching: DCCT*) (Figure 5A). Live  
221 imaging revealed that the total DCCT length increased by 26 % from 56 to 72 hpf,  
222 (Figure 5B, C) and formed one additional branch on average in Tg[SAIG213A]  
223 Tg[UAS:GFP] larvae. Intriguingly, we noticed that a minor but significant population  
224 of single CaPs (24 %) increased their total DCCT length with a decrease in the number

225 of collateral branches (Figure 5D), indicating that normal DCCT outgrowth involves  
226 both extension and shrinkage, as the extension occurs more frequently. The expression  
227 of opTDP-43z itself did not affect the average DCCT outgrowth rate and branch  
228 number under dark conditions at 56 hpf (Figure 5D, E). On the other hand, the average  
229 DCCT growth rate significantly declined by 11 % with at 72 hpf, when CaPs expressing  
230 opTDP-43z had been illuminated for 3 hours (from 56 to 59 hpf) (Figure 5D).  
231 Remarkably, 28 % (5 out of 18 DCCTs) of the illuminated CaPs exhibited total DCCT  
232 lengths (Figure 5C), and 44 % showed reduced DCCT branch number (Figure 5E),  
233 demonstrating that axon shrinkage contributes to the observed axon outgrowth defects.

234 We then investigated whether the DCCT shrinkage involves myofiber  
235 denervation by live monitoring of pre- and postsynaptic structures with Vamp2-Venus  
236 and tdTomato-tagged acetylcholine receptor (dT-chrnd), respectively (Figure 5F) <sup>36</sup>. We  
237 found that, in both wild-type and opTDP-43z expression conditions prior to light  
238 stimulation, the DCCT axon terminals were decorated by Vamp2-Venus and the  
239 Vamp2-Venus signals were well colocalized with dT-chrnd (Figure 5F, G), indicating  
240 normal neuromuscular assembly (Figure 5F). Live imaging revealed that, in the  
241 opTDP-43z-expressing CaPs after the 3 hours of illumination (during 56-59 hpf),  
242 Vamp2-Venus and juxtaposed dT-chrnd speckles at the axon terminal disappeared  
243 (Figure 5I), demonstrating that a decrement in DCCT terminal number is accompanied  
244 by myofiber denervation (Figure 5E). Such disappearance of juxtaposed Vamp2-Venus  
245 and dT-chrnd was also observed in wild-type DCCTs (Figure 5E, H). Overall, these  
246 observations show that the DCCT shrinkage is associated with myofiber denervation,  
247 and that optogenetic TDP-43 oligomerization raises the denervation frequency.

248

#### 249 **Cytoplasmic aggregation of opTDP-43h that seeds non-optogenetic TDP-43** 250 **aggregation in the spinal motor neurons**

251 Targeted optogenetic stimulation via confocal laser scanning required the fish to be  
252 agarose-embedded, which restricted the illumination duration to a maximum of ~4

253 hours fully maintain fish viability. We aimed to test if a longer illumination period  
254 potentially induces cytoplasmic aggregation of the optogenetic TDP-43 in the spinal  
255 motor neurons. We constructed transgenic fish in which most of the spinal motor  
256 neurons expressed a CRY2olig-tagged human TDP-43 (opTDP-43h, for optogenetic  
257 TDP-43 of human) from an *mnr2b*-BAC transgene (Tg[*mnr2b*-hs:opTDP-43h]) (Figure  
258 6A)(Sup. Figure 1E)<sup>31</sup> and established a system for longitudinal field illumination of  
259 blue LED light using unrestrained fish. The Tg[*mnr2b*-hs:opTDP-43h] and  
260 Tg[*mnr2b*-hs:EGFP-TDP-43z] transgenes were combined to allow for simultaneous live  
261 monitoring of opTDP-43h and non-optogenetic TDP-43 in the spinal motor neurons.  
262 Prior to the illumination, both opTDP-43h and EGFP-TDP-43z were primarily localized  
263 in the nucleus at 2 days post-fertilization (dpf) (Figure 6B). We found that opTDP-43h  
264 was dispersed throughout the cell and formed aggregates in the cytoplasm at 3 dpf, and  
265 that aggregation was further enhanced over the subsequent 48 hours of illumination (i.e.  
266 3-5 dpf). Despite distinct cytoplasmic opTDP-43h mislocalization and aggregation,  
267 EGFP-TDP-43z was predominantly localized to the nucleus during 2-4 dpf, suggesting  
268 that opTDP-43h mislocalization and aggregation occurred independently of  
269 EGFP-TDP-43z during the 48 hours of illumination. Intriguingly, at later time points  
270 (e.g. 5 dpf) when the cytoplasmic opTDP-43h developed into larger aggregates,  
271 EGFP-TDP-43z became detectable in the cytoplasm and formed distinct foci that  
272 colocalized with opTDP-43h aggregates (Figure 6C), indicating that, the long term  
273 light-induced opTDP-43h aggregates seeds aggregation of non-optogenetic TDP-43.

274

### 275 **IDR mutation A315T enhances protein stability and oligomerization-dependent** 276 **toxicity of TDP-43**

277 The gradual mislocalization and aggregation of non-optogenetic TDP-43 promoted by  
278 the light-stimulated opTDP-43h prompted us to hypothesize that opTDP-43h first  
279 oligomerizes via the CRY2olig module and subsequently seeds non-optogenetic  
280 TDP-43 aggregation, via its aggregate-prone IDR<sup>10, 37</sup>. To test whether the IDR

281 contributes to light-dependent toxicity of opTDP-43h, we created an opTDP-43 mutant  
282 with an IDR mutation (A315T) linked to familial ALS (opTDP-43h<sup>A315T</sup>) and expressed  
283 opTDP-43h<sup>A315T</sup> widely in the spinal motor neurons from Tg[mnr2b-hs:opTDP-43h<sup>A315T</sup>].  
284 In Tg[mnr2b-hs:opTDP-43h<sup>A315T</sup>] Tg[mnr2b-hs:EGFP-TDP-43z] double transgenic fish,  
285 opTDP-43h<sup>A315T</sup> displayed nuclear-enriched localization prior to the LED illumination at  
286 48 hpf. We noted that the expression level of opTDP-43h<sup>A315T</sup> protein was less than that  
287 of opTDP-43h in the Tg[mnr2b-hs:opTDP-43h] fish, partly due to the lower level of  
288 mRNA (Figure 6E). Nonetheless, in response to illumination, opTDP-43h<sup>A315T</sup>  
289 mislocalized to the cytoplasm, formed aggregates within 24 hours of illumination and  
290 seeded cytoplasmic aggregates containing non-optogenetic EGFP-TDP-43z (Figure 6C,  
291 D). We then quantified the amounts of opTDP-43h and opTDP-43h<sup>A315T</sup> proteins in the  
292 single cells before and after the initial 24 hours of illumination (2-3 dpf), by using  
293 EGFP-TDP-43z expressed from Tg[mnr2b-hs:EGFP-TDP-43z] as an internal control.  
294 the relative intensity of opTDP-43h<sup>A315T</sup> significantly increased during the illumination  
295 by 3 dpf while that of opTDP-43h remained unchanged (Figure 6F, G, H), indicating  
296 that the A315T mutation increases the protein stability. This observation is consistent  
297 with the previous observations in cultured neurons<sup>11, 38</sup>. The illuminated  
298 Tg[mnr2b-hs:opTDP-43h] Tg[mnr2b-hs:EGFP-TDP-43z] larvae were viable with  
299 seemingly normal free-swimming activity at 5-6 dpf, suggesting that the toxicity  
300 associated with light-stimulated opTDP-43h has only a minor effect at the behavioral  
301 level. On the other hand, 18 % of the illuminated fish expressing opTDP-43h<sup>A315T</sup>, but  
302 none of the non-illuminated siblings, failed to inflate the swim bladder at 5 dpf and  
303 showed declined locomotor ability (Figure 6I, Sup Movie 5), indicating that the A315T  
304 mutation enhances oligomerization-dependent toxicity of opTDP-43h. Altogether, these  
305 observations suggest that the IDR of TDP-43 causes the oligomerization-dependent  
306 toxicity in the spinal motor neurons.

307

308 **Discussion**

309 Pathological aggregation of TDP-43 via the IDRs is proposed to be antagonized by  
310 N-terminal-mediated homo-oligomerization under physiological conditions<sup>6,15</sup>. In this  
311 study, we successfully developed CRY2olig-mediated TDP-43 oligomerization system  
312 *in vivo* and demonstrated CRY2olig-mediated oligomerization led to the accumulation  
313 of cytoplasmic opTDP-43 aggregates in the zebrafish spinal motor neurons. This  
314 CRY2olig-driven opTDP-43 oligomerization would initially generate reversible  
315 interactions within the IDRs, some of which occasionally transform into an irreversible  
316 form. Then, such irreversible “knots” of opTDP-43 eventually seed IDR-mediated  
317 aggregation of non-optogenetic TDP-43 (Figure 7). Under our illumination conditions,  
318 the spinal motor neurons require up to 3 hours to fully disperse opTDP-43 throughout  
319 the cell, 24 hours to accumulate distinct cytoplasmic opTDP-43 aggregates, and several  
320 additional days to develop cytoplasmic opTDP-43 aggregates containing  
321 non-optogenetic TDP-43. This sequentially regulated illumination-triggered TDP-43  
322 knot and aggregate formation enables direct observation of spinal motor neuron  
323 pathology as triggered by IDR-mediated TDP-43 oligomerization. We propose that this  
324 opTDP-43-triggered pathology may correspond to a fast-forwarding of spinal motor  
325 neuron degeneration in ALS, in which a majority of cases are believed to involve  
326 IDR-mediated TDP-43 aggregation, yet currently allows very restricted anatomical  
327 access.

328         We discovered that the reversible cytoplasmic opTDP-43 mislocalization  
329 induced by short-term light illumination was sufficient to cause defective motor axon  
330 outgrowth accompanied by enhanced myofiber denervation. The physiological  
331 nuclear-enriched TDP-43 localization is sustained by nucleocytoplasmic transport  
332 system<sup>34, 35</sup> as well as protein degradation systems in the cytoplasm, such as the  
333 ubiquitin proteasome system (UPS) and autophagy<sup>39, 40</sup>. Since the light-dependent  
334 cytoplasmic opTDP-43 mislocalization commences without affecting non-optogenetic  
335 TDP-43 localization, the toxicity accompanied by opTDP-43 mislocalization may not  
336 be caused by a global shutdown of nucleocytoplasmic transport or proteolysis systems

337 for TDP-43, but rather by dysregulation of RNAs and/or proteins being bound by  
338 opTDP-43. TDP-43 can associate with more than 6,000 RNA targets<sup>41-44</sup>, and  
339 RNA-binding is antagonistic to toxic TDP-43 oligomerization in an optogenetic cellular  
340 model<sup>28</sup>, implying that light-dependent opTDP-43 oligomerization would profoundly  
341 affect its RNA-binding capacity, thereby influencing the expression of a myriad of  
342 genes. In terms of the axon outgrowth defect, whether toxicity is ascribable to  
343 dysregulation of specific key proteins<sup>39,45</sup> or to a widespread translational abnormality  
344<sup>46</sup>, which could lead to stress-inducing misfolded protein accumulation, remains to be  
345 investigated. Nevertheless, the normal motor axon pathfinding and unaffected branching  
346 frequency suggest a certain specificity of opTDP-43 toxicity and would favor the idea  
347 that the cellular growth pathway is primarily affected by the toxicity. It should also be  
348 noted that our current illumination paradigm encompasses not only the somas but also  
349 the motor axons. Therefore, “resident” cytoplasmic opTDP-43, such as that included in  
350 mRNP granules undergoing axonal transport<sup>47</sup> and in mitochondria at the axon  
351 terminals<sup>48,49</sup>, could also be photoconverted *in situ*, thereby contributing to the acute  
352 toxicity that involves neuromuscular synapse destabilization. Spatially-resolved light  
353 stimulation, a major advantage of optogenetics, could identify such potentially multiple  
354 pathogenic origins in the future.

355         The light-dependent cytoplasmic opTDP-43 mislocalization provides  
356 unexpected insight into the relationships between TDP-43 multimerization, localization,  
357 and toxicity, given that a toxic level of mRFP1-TDP-43 overexpression led neither to  
358 cytoplasmic mislocalization nor aggregation. The persistent nuclear localization of  
359 overexpressed mRFP1-TDP-43 indicates a robustness of the nucleocytoplasmic  
360 transport and cytoplasmic protein degradation systems against proteostatic perturbation  
361 of TDP-43. On the other hand, these TDP-43 surveillance systems appear to be inert  
362 against the IDR-mediated TDP-43 oligomers, as evidenced by the light-dependent  
363 cytoplasmic opTDP-43 mislocalization. These manipulations of proteostasis and  
364 multimerization revealed that a dosage increase of TDP-43 does not immediately lead to

365 IDR-mediated oligomerization in the spinal motor neurons, and therefore TDP-43  
366 toxicity associated with proteostatic abrogation could be mechanistically distinct from  
367 that caused by IDR-mediated oligomerization. Importantly, our animal model approach  
368 explicitly revealed a striking cell-type variation of opTDP-43 mislocalization and  
369 aggregation, such that the neuronal cells are less prone to accumulate opTDP-43  
370 aggregates compared to the differentiating muscle cells, while both of these cell types  
371 are inherently more competent for cytoplasmic mislocalization than the epithelial cells.  
372 Although the mechanisms underlying this cell-type specificity remain unknown, the  
373 present and previous observations<sup>50</sup> emphasize the importance of studying vulnerable  
374 cell types *in vivo* for accurately disclosing the mechanisms underlying TDP-43  
375 localization, and thereby toxicity.

376           The verification that CRY2olig-mediated opTDP-43 oligomerization is toxic  
377 to the spinal motor neurons instead made it difficult to evaluate the toxicity derived  
378 from opTDP-43 aggregates alone, as the oligomeric and aggregate forms of opTDP-43  
379 coexists during illumination. In this regard, it is noteworthy that the opTDP-43h<sup>A315T</sup>  
380 that was expressed less and formed fewer cytoplasmic aggregates was more toxic than  
381 the opTDP-43h expressed in larger amounts (Figure 6), which provides an *in vivo*  
382 example in which the amount of accumulated TDP-43 aggregates does not necessarily  
383 predict the degree of TDP-43 toxicity<sup>16,17</sup>. It was recently proposed that TDP-43 adopts  
384 both reversible and irreversible  $\beta$ -sheet aggregates that are involved in the formation of  
385 membraneless organelles, such as stress granules (SGs) and pathogenic amyloids,  
386 respectively, and that ALS mutations, including A315T, can promote the transition of  
387 such reversible to irreversible pathogenic aggregation<sup>13</sup>. Also, in frontotemporal lobar  
388 degeneration (FTLD), TDP-43 displays distinct aggregate assemblies and toxic effects  
389 in disease-subtype-specific manners<sup>51</sup>. Thus, it is possible that light-induced opTDP-43  
390 aggregates are in fact heterogeneous and only a certain form of aggregates become  
391 pathogenic and acquire seeding activity for non-optogenetic TDP-43 aggregation. The  
392 time lag (~48 hours) between opTDP-43's own aggregation and subsequent

393 opTDP-43-dependent non-optogenetic TDP-43 aggregation might represent the time  
394 required for speciation of IDR interactions to develop such seeding capacity. The  
395 toxicity of opTDP-43 aggregates should be evaluated by considering such potential  
396 heterogeneity, and therefore remains as a challenging but important question to be  
397 addressed. Alternatively, the seeding capacity for non-optogenetic TDP-43 aggregation  
398 suggests that the toxicity of opTDP-43 aggregates can be exerted as a long-term effect  
399 through gradual depletion of the available nuclear and cytoplasmic TDP-43 pools into  
400 these aggregates, which would manifest as a TDP-43 loss-of-function phenotype.

401           It has been estimated that, even during healthy aging, the spinal motor  
402 neurons are substantially lost<sup>52-54</sup>. As a result, the surviving motor units are enlarged to  
403 preserve maximal force generating capacity by compensatory collateral reinnervation<sup>55</sup>.  
404 ALS has also been characterized by an elevated number of muscle fibers innervated by  
405 a single subterminal axon<sup>56</sup>, which is likely a remnant of such compensatory collateral  
406 reinnervation events. In the present study, we found by live imaging of axon collateral  
407 that an innervation territory of healthy spinal motor neurons is determined by a balance  
408 between assembly and disassembly of neuromuscular synapses in zebrafish. We further  
409 discovered that optogenetic opTDP-43 oligomerization could tip the balance toward  
410 disassembly and decrease the total collateral length. Therefore, our results predict that,  
411 once a cellular concentration of IDR-mediated TDP-43 oligomers reaches a critical  
412 level, a spinal motor neuron would begin to reduce its motor unit size through repetition  
413 of incomplete denervation/reinnervation cycles. Such neurons would also be defective  
414 in complementing damaged neighboring motor units through collateral reinnervation,  
415 which would accelerate the manifestation of motor decline. We envision that opTDP-43  
416 allows for approaching the mechanisms underlying such dynamic  
417 innervation/reinnervation balancing of spinal motor axons in health and  
418 TDP-43-associated pathology, as well as for interrogating how not only motor neurons  
419 but also diverse types of surrounding cells, including muscle, glial and endothelial cells,  
420 respond to and modify TDP-43 toxicity. Moreover, combined with the feasibility of



421 high-throughput, whole organism chemical screening in zebrafish, opTDP-43-mediated  
422 motor neuron pathogenesis should be extended for exploring small molecules that  
423 restore a normal denervation/reinnervation balance for spinal motor neurons, which  
424 might serve as drugs for ALS and other TDP-43 proteinopathy.

425

#### 426 **Acknowledgements**

427 Authors would like to thank Drs Keiko Imamura and Haruhisa Inoue for valuable  
428 discussions and Kawakami lab members for generous support. This work was supported  
429 by SERIKA FUND (KA), The Nakabayashi Trust For ALS Research (KA), THE  
430 KATO MEMORIAL TRUST FOR NAMBYO RESEARCH (KA), Daiichi-Sankyo  
431 Foundation of Life Science (KA), Takeda Science Foundation (KA), KAKENHI Grant  
432 numbers JP16K07045 (KA), JP19K06933 (KA), National BioResource Project from  
433 Japan Agency for Medical Research and Development (AMED) (K.K.), and KAKENHI  
434 Grant Numbers JP15H02370 (K.K.).

435

#### 436 **Author contributions**

437 KA conceived the research, designed and performed the experiments. KA and KK  
438 analyzed the data and wrote the manuscript with inputs from HH.

439

#### 440 **Competing Interests**

441 KA and KK have filed a patent application (JP2018-186569) based on this work with  
442 the Japan Patent Office.

443

#### 444 **Methods**

445 Fish lines

446 This study was carried out in accordance with the Guide for the Care and Use of  
447 Laboratory Animals of the Institutional Animal Care and Use Committee (IACUC,  
448 approval identification number 24-2) of the National Institute of Genetics (NIG, Japan),

449 which has an Animal Welfare Assurance on file (assurance number A5561-01) at the  
450 Office of Laboratory Animal Welfare of the National Institutes of Health (NIH, USA).  
451 Fish were raised under 12:12 light-dark (L/D) cycles during the first 5 days after birth,  
452 unless otherwise stated.

453

#### 454 *Transgenic fish lines*

455 Tg[UAS:mRFP1-TDP-43z] was generated by synthesizing a *Tol2* transposon-based  
456 cassette (UAS:mRFP1-TDP-43z) carrying the zebrafish *tardbp* (Genbank accession #  
457 NM\_2014476) that was tagged with mRFP1 (Genbank accession # AF506027.1) at the  
458 N-terminus with linker peptide and placed downstream of x5 upstream activation  
459 sequence (UAS)<sup>57</sup> (pBMH-T2ZUASRzT43, Biomatik). For constructing  
460 Tg[UAS:mRFP1-CRY2olig], the zebrafish codon-optimized photolyase homology  
461 region (PHR) of *Arabidopsis thaliana* CRY2 carrying the E490G mutation  
462 (CRY2olig)<sup>33</sup> was synthesized (Biomtik) and N-terminally tagged with mRFP1 with a  
463 linker peptide TRDISIE encoded by ACG CGT GAT ATC TCG ATC GAG  
464 (mRFP1-CRY2olig). The mRFP1-CRY2olig fragment was fused to 5xUAS, cloned into  
465 the *Tol2*-transposon cassette. For the construction of Tg[UAS:opTDP-43z], the  
466 mRFP1-TDP-43z fragment was C-terminally fused to CRY2olig with the linker peptide  
467 TRDISIE (opTDP-43z). The opTDP-43z fragment was fused to 5xUAS, cloned into the  
468 *Tol2*-transposon cassette. NEBuilder HiFi DNA Assembly Master Mix was used for the  
469 vector construction. For the generation of Tg[mnr2b-hs:EGFP-TDP-43z], EGFP was  
470 directly fused to zebrafish *tardbp* gene (EGFP-TDP-43z) and the resulting  
471 EGFP-TDP-43z was linked to the *hsp70l* promoter (650 bp) and introduced into  
472 downstream of the *mnr2b* 5'UTR in the *mnr2b*-BAC DNA (CH211-172N16, BACPAC  
473 Resources Center) via homologous recombination using a Km<sup>r</sup>-resistance as essentially  
474 described<sup>58</sup>. Tg[mnr2b-hs:opTDP-43h] and Tg[mnr2b-hs:opTDP-43h<sup>A315T</sup>] lines were  
475 generated by the same procedure except that opTDP-43h and opTDP-43h<sup>A315T</sup> were  
476 used, respectively, instead of EGFP-TDP-43z. The opTDP-43h consists of the

477 zebrafish-codon-optimized human TDP-43 that is fused directly to the  
478 zebrafish-codon-optimized mRFP1 at the N-terminus and indirectly to CRY2olig via  
479 the linker peptide TRDISIE. opTDP-43h<sup>A315T</sup> is identical to opTDP-43h except A315T  
480 mutation (GCT > ACT). All transgenic lines were created via *Tol2*-mediated  
481 transgenesis.

482

#### 483 *TDP-43 knockout*

484 For the generation of *tardbp* and *tardbpl* knockout fish, target sequences for  
485 Cas9-mediated cleavage were searched by CRISPRscan<sup>59</sup>. The target sequences  
486 CAAGACTTAAAAGACTACTTcgg and CAAGACTTAAAAGACTACTTcgg, where  
487 the protospacer adjacent motifs (PAMs) are indicated by lower cases, were chosen for  
488 the generation of *tardbp-n115* and *tardbpl-n94* alleles, respectively. hSpCas9 was *in*  
489 *vitro*-transcribed with mMESSAGE mMACHINE Kit (Thermo Fisher Scientific,  
490 AM1340) by using pCS2+hSpCas9 plasmid as a template (a gift from Masato Kinoshita,  
491 Addgene plasmid # 51815). Wild type embryos were injected with 25 pg of sgRNA and  
492 300 pg of hSpCas9 mRNA at the one-cell stage.

493

#### 494 *Rescue experiment of TDP-43 knockout fish via mRNA injection*

495 For the expression of human and zebrafish TDP-43 and its derivatives via mRNA  
496 injection, the open reading frames of zebrafish *tardbp* (TDP-43z), zebrafish-codon  
497 optimized human TDP-43 (TDP-43h), mRFP1-tagged zebrafish *tardbp*  
498 (mRFP1-TDP-43z) and opTDP-43z was cloned into pCS2+ vector *in vitro*-transcribed  
499 with mMESSAGE mMACHINE Kit. First, we injected varied amount of TDP-43z  
500 mRNA into the offspring obtained from incrosses of parental zebrafish carrying  
501 homozygous *tardbp-n115* and heterozygous *tardbpl-n94* mutation or heterozygous  
502 *tardbp-n115* and homozygous *tardbpl-n94* mutation at the one cell stage. After  
503 investigating the presence or absence of blood flow at 36-48 hpf, all fish were subjected  
504 individually to genotyping for *tardbp-n115* and *tardbpl-n94* alleles. The uninjected

505 *tardbp-n115 tardbpl-n94* double homozygotes displayed a swollen heart that was  
506 beating, but the blood cells were completely stacked on the yolk surface and cannot  
507 reach the heart. An injection of 150 ng of TDP-43z mRNA was the most effect effective  
508 in restoring blood flow (up to 40% of the double homozygotes) of the double  
509 homozygotes with a minimum developmental abnormality due to overexpression.  
510 Throughout the assay, we scored that the blood flow was “rescued” when any blood cell  
511 flowing through the beating heart was observed. The function of TDP-43h and TDP-43  
512 derivatives were tested by the microinjection of 150 ng mRNA each. The *tardbpl-n115*  
513 allele was identified by performing Heteroduplex Mobility Assay (HMA) against PCR  
514 product obtained with a primer pair: *tardbp-6F3* (5'-gcc aga taa taa gag gaa gat gga-3')  
515 and *tardbpl-6R3* (5'-tga cag tac aaa gac aaa cac cac-3'). The *tardbpl-n94* allele was  
516 similarity identified by using a primer pair: *tardbpl-4F2* (5'-caa tca ctg aat gaa tgc act  
517 ttt-3') and *tardbpl-4R2* (5'-ggt tgc tta tac taa cct gca cca-3').

518

#### 519 *Blue light illumination*

520 Short-term (< 4 hours) light stimulations of mRFP1-CRY2olig and opTDP-43z were  
521 carried out by embedding fish in the 0.8-1 % low-melting agarose (NuSieve® GTG®  
522 Agarose, Lonza) and conducting confocal scanning with the laser with 473 nm wave  
523 length using an Olympus FV1200 microscope. The average optical power of the  
524 confocal laser was approximately 44.66  $\mu\text{W}/\text{cm}^2$ . For longer-term illumination, fish  
525 were raised in 6-well dish with 8 ml E3 buffer, and the dish was placed on a blue LED  
526 panel.

527

#### 528 *Immunohistochemistry*

529 For the mono- and polyubiquitinated protein staining, Tg[SAGFF73A]  
530 Tg[UAS:opTDP-43z] fish at 31.5 hpf that had illuminated with a blue light were taken  
531 out from the agarose and immediately subjected to immunohistochemistry. For short,  
532 fish were fixed for 2 hours with PBS (pH 7.4) containing 4.0 % paraformaldehyde. The

533 mouse monoclonal antibody for mono- and polyubiquitinate conjugates (1/100, FK2,  
534 Enzo) and goat anti-mouse Alexa Fluor 488 (1:1,000, Molecular Probes) were used as  
535 primary and secondary antibodies, respectively. To detect opTDP-43z, the Anti-RFP  
536 rabbit polyclonal antibody (pAb, MBL) and goat anti-rabbit Alexa Fluor 633 (1:1,000,  
537 Molecular Probes) were used as primary and secondary antibodies, respectively.

538

### 539 *Microscopic analysis*

540 For confocal microscopy, a live embryo or larva was embedded in 0.8-1 % low-melting  
541 agarose (NuSieve® GTG® Agarose, Lonza) on a Glass Base dish (IWAKI, 3010-035)  
542 and subject to confocal microscopy using an Olympus FV1200 laser confocal  
543 microscope. Images of live embryos and larvae were acquired as serial sections along  
544 the z-axis and analyzed with Olympus Fluoview Ver2.1b Viewer, Image J and Adobe  
545 Photoshop CS6. The axon length and branching frequency were measured by Imaris  
546 Filament Tracer. A neurite with more than 5  $\mu\text{m}$  of length was counted as branch.  
547 Morphological analyses of CaP were restricted to the spinal segment 14-17 before 50  
548 hpf and to 13-17 during 56–72 hpf. For the quantitation of opTDP-43z in the skeletal  
549 muscle cells, averaged change of opTDP-43 intensity in the cytoplasm (D) and nucleus  
550 (E) during the illumination (N = 8 cells). \*, p = 0.0097. For quantitation of opTDP-43h  
551 fluorescence intensity over EGFP-TDP-43z in the spinal motor neurons, a z-stack image  
552 of the spinal motor column was first created by Sum Slices function of ImageJ. Then,  
553 the soma area was defined by the contour of weak cytosolic fluorescence of  
554 EGFP-TDP-43z and the fluorescent intensities of opTDP-43h and EGFP-TDP-43z in  
555 the soma area were measured for individual cells using imageJ software. Statistical  
556 analyses were performed using GraphPad Prism Software.

557

### 558 *RT-PCR*

559 The total RNA was prepared from Tg[mnr2b-hs:EGFP-TDP43z],  
560 Tg[mnr2b-hs:EGFP-TDP43z] Tg[mnr2b-hs:opTDP-43h], and

561 Tg[mnr2b-hs:EGFP-TDP43z] Tg[mnr2b-hs:opTDP-43h<sup>A315T</sup>] larvae at 72 hpf (17 larvae  
562 each) by homogenizing in 1 ml of Trizol Reagent (Life Technologies) . Three  $\mu$ g of the  
563 total RNA is used for cDNA synthesis using oligo dT (SuperScriptn®III First-Strand,  
564 Invitrogen). opTDP-43h and opTDP-43h<sup>A315T</sup> were detected by a primer pair against the  
565 zebrafish codon-optimized mRFP1: zmRFP1-123f (5'-TCA GAC AGC TAA ACT  
566 GAA GGT CAC-3') and zmRFP1-633r (5'-GAC GAT GGT ATA GTC TTC GTT  
567 GTG-3'). EGFP-TDP-43z was detected by a primer pair against EGFP: EGFP-f2s  
568 (5'-CAC ATG AAG CAG CAC GAC TTC T-3') and EGFP-r5s (5'-ACG TTG TGG  
569 CTG TTG TAG TTG T-3'). zfan5b expression was detected by a primer pair:  
570 zfan5b--133f (5'-ATA GTA CAC ACC GAA ACG GAC AC-3') and zfan5b-772r  
571 (5'-TTA TAT TCT CTG GAT TTT ATC GGC-3')

572

### 573 *Data availability*

574 The data that support the findings in this study are available within the article and its  
575 Supplemental Information files, and from the corresponding authors upon request.

576

### 577 **References**

- 578 1. Arai, T. *et al.* TDP-43 is a component of ubiquitin-positive tau-negative  
579 inclusions in frontotemporal lobar degeneration and amyotrophic lateral  
580 sclerosis. *Biochem Biophys Res Commun* **351**, 602-611 (2006).
- 581 2. Neumann, M. *et al.* Ubiquitinated TDP-43 in frontotemporal lobar degeneration  
582 and amyotrophic lateral sclerosis. *Science* **314**, 130-133 (2006).
- 583 3. Mackenzie, I.R. *et al.* Pathological TDP-43 distinguishes sporadic amyotrophic  
584 lateral sclerosis from amyotrophic lateral sclerosis with SOD1 mutations. *Ann*  
585 *Neurol* **61**, 427-434 (2007).
- 586 4. Tan, C.F. *et al.* TDP-43 immunoreactivity in neuronal inclusions in familial  
587 amyotrophic lateral sclerosis with or without SOD1 gene mutation. *Acta*  
588 *Neuropathol* **113**, 535-542 (2007).
- 589 5. Lagier-Tourenne, C., Polymenidou, M. & Cleveland, D.W. TDP-43 and  
590 FUS/TLS: emerging roles in RNA processing and neurodegeneration. *Hum Mol*

- 591            *Genet* **19**, R46-64 (2010).
- 592    6.    Afroz, T. *et al.* Functional and dynamic polymerization of the ALS-linked  
593            protein TDP-43 antagonizes its pathologic aggregation. *Nat Commun* **8**, 45  
594            (2017).
- 595    7.    Shiina, Y., Arima, K., Tabunoki, H. & Satoh, J. TDP-43 dimerizes in human  
596            cells in culture. *Cell Mol Neurobiol* **30**, 641-652 (2010).
- 597    8.    Zhang, Y.J. *et al.* The dual functions of the extreme N-terminus of TDP-43 in  
598            regulating its biological activity and inclusion formation. *Hum Mol Genet* **22**,  
599            3112-3122 (2013).
- 600    9.    Conicella, A.E., Zerze, G.H., Mittal, J. & Fawzi, N.L. ALS Mutations Disrupt  
601            Phase Separation Mediated by alpha-Helical Structure in the TDP-43  
602            Low-Complexity C-Terminal Domain. *Structure* **24**, 1537-1549 (2016).
- 603    10.   Johnson, B.S. *et al.* TDP-43 is intrinsically aggregation-prone, and amyotrophic  
604            lateral sclerosis-linked mutations accelerate aggregation and increase toxicity. *J*  
605            *Biol Chem* **284**, 20329-20339 (2009).
- 606    11.   Watanabe, S., Kaneko, K. & Yamanaka, K. Accelerated disease onset with  
607            stabilized familial amyotrophic lateral sclerosis (ALS)-linked mutant TDP-43  
608            proteins. *J Biol Chem* **288**, 3641-3654 (2013).
- 609    12.   Budini, M. *et al.* Role of selected mutations in the Q/N rich region of TDP-43 in  
610            EGFP-12xQ/N-induced aggregate formation. *Brain Res* **1462**, 139-150 (2012).
- 611    13.   Guenther, E.L. *et al.* Atomic structures of TDP-43 LCD segments and insights  
612            into reversible or pathogenic aggregation. *Nat Struct Mol Biol* **25**, 463-471  
613            (2018).
- 614    14.   Zhang, Y.J. *et al.* Aberrant cleavage of TDP-43 enhances aggregation and  
615            cellular toxicity. *Proc Natl Acad Sci U S A* **106**, 7607-7612 (2009).
- 616    15.   Jiang, L.L. *et al.* The N-terminal dimerization is required for TDP-43 splicing  
617            activity. *Sci Rep* **7**, 6196 (2017).
- 618    16.   Arnold, E.S. *et al.* ALS-linked TDP-43 mutations produce aberrant RNA  
619            splicing and adult-onset motor neuron disease without aggregation or loss of  
620            nuclear TDP-43. *Proc Natl Acad Sci U S A* **110**, E736-745 (2013).
- 621    17.   Barmada, S.J. *et al.* Cytoplasmic mislocalization of TDP-43 is toxic to neurons  
622            and enhanced by a mutation associated with familial amyotrophic lateral  
623            sclerosis. *J Neurosci* **30**, 639-649 (2010).

- 624 18. Ebstein, S.Y., Yagudayeva, I. & Shneider, N.A. Mutant TDP-43 Causes  
625 Early-Stage Dose-Dependent Motor Neuron Degeneration in a TARDBP  
626 Knockin Mouse Model of ALS. *Cell Rep* **26**, 364-373 e364 (2019).
- 627 19. Shan, X., Chiang, P.M., Price, D.L. & Wong, P.C. Altered distributions of  
628 Gemini of coiled bodies and mitochondria in motor neurons of TDP-43  
629 transgenic mice. *Proc Natl Acad Sci U S A* **107**, 16325-16330 (2010).
- 630 20. Stallings, N.R., Puttappathi, K., Luther, C.M., Burns, D.K. & Elliott, J.L.  
631 Progressive motor weakness in transgenic mice expressing human TDP-43.  
632 *Neurobiol Dis* **40**, 404-414 (2010).
- 633 21. Wegorzewska, I., Bell, S., Cairns, N.J., Miller, T.M. & Baloh, R.H. TDP-43  
634 mutant transgenic mice develop features of ALS and frontotemporal lobar  
635 degeneration. *Proc Natl Acad Sci U S A* **106**, 18809-18814 (2009).
- 636 22. White, M.A. *et al.* TDP-43 gains function due to perturbed autoregulation in a  
637 Tardbp knock-in mouse model of ALS-FTD. *Nat Neurosci* **21**, 552-563 (2018).
- 638 23. Wils, H. *et al.* TDP-43 transgenic mice develop spastic paralysis and neuronal  
639 inclusions characteristic of ALS and frontotemporal lobar degeneration. *Proc*  
640 *Natl Acad Sci U S A* **107**, 3858-3863 (2010).
- 641 24. Xu, Y.F. *et al.* Wild-type human TDP-43 expression causes TDP-43  
642 phosphorylation, mitochondrial aggregation, motor deficits, and early mortality  
643 in transgenic mice. *J Neurosci* **30**, 10851-10859 (2010).
- 644 25. Xu, Y.F. *et al.* Expression of mutant TDP-43 induces neuronal dysfunction in  
645 transgenic mice. *Mol Neurodegener* **6**, 73 (2011).
- 646 26. Braak, H., Ludolph, A.C., Neumann, M., Ravits, J. & Del Tredici, K.  
647 Pathological TDP-43 changes in Betz cells differ from those in bulbar and spinal  
648 alpha-motoneurons in sporadic amyotrophic lateral sclerosis. *Acta Neuropathol*  
649 **133**, 79-90 (2017).
- 650 27. Shin, Y. *et al.* Spatiotemporal Control of Intracellular Phase Transitions Using  
651 Light-Activated optoDroplets. *Cell* **168**, 159-171 e114 (2017).
- 652 28. Mann, J.R. *et al.* RNA Binding Antagonizes Neurotoxic Phase Transitions of  
653 TDP-43. *Neuron* **102**, 321-338 e328 (2019).
- 654 29. Zhang, P. *et al.* Chronic optogenetic induction of stress granules is cytotoxic and  
655 reveals the evolution of ALS-FTD pathology. *Elife* **8** (2019).
- 656 30. Myers, P.Z. Spinal motoneurons of the larval zebrafish. *J Comp Neurol* **236**,



- 657 555-561 (1985).
- 658 31. Schmid, B. *et al.* Loss of ALS-associated TDP-43 in zebrafish causes muscle  
659 degeneration, vascular dysfunction, and reduced motor neuron axon outgrowth.  
660 *Proc Natl Acad Sci U S A* **110**, 4986-4991 (2013).
- 661 32. Asakawa, K. & Kawakami, K. The Tol2-mediated Gal4-UAS method for gene  
662 and enhancer trapping in zebrafish. *Methods* **49**, 275-281 (2009).
- 663 33. Taslimi, A. *et al.* An optimized optogenetic clustering tool for probing protein  
664 interaction and function. *Nat Commun* **5**, 4925 (2014).
- 665 34. Pinarbasi, E.S. *et al.* Active nuclear import and passive nuclear export are the  
666 primary determinants of TDP-43 localization. *Sci Rep* **8**, 7083 (2018).
- 667 35. Winton, M.J. *et al.* Disturbance of nuclear and cytoplasmic TAR DNA-binding  
668 protein (TDP-43) induces disease-like redistribution, sequestration, and  
669 aggregate formation. *J Biol Chem* **283**, 13302-13309 (2008).
- 670 36. Asakawa, K. & Kawakami, K. Protocadherin-Mediated Cell Repulsion Controls  
671 the Central Topography and Efferent Projections of the Abducens Nucleus. *Cell*  
672 *Rep* **24**, 1562-1572 (2018).
- 673 37. Santamaria, N., Alhothali, M., Alfonso, M.H., Breydo, L. & Uversky, V.N.  
674 Intrinsic disorder in proteins involved in amyotrophic lateral sclerosis. *Cell Mol*  
675 *Life Sci* **74**, 1297-1318 (2017).
- 676 38. Austin, J.A. *et al.* Disease causing mutants of TDP-43 nucleic acid binding  
677 domains are resistant to aggregation and have increased stability and half-life.  
678 *Proc Natl Acad Sci U S A* **111**, 4309-4314 (2014).
- 679 39. Klim, J.R. *et al.* ALS-implicated protein TDP-43 sustains levels of STMN2, a  
680 mediator of motor neuron growth and repair. *Nat Neurosci* **22**, 167-179 (2019).
- 681 40. Scotter, E.L. *et al.* Differential roles of the ubiquitin proteasome system and  
682 autophagy in the clearance of soluble and aggregated TDP-43 species. *J Cell Sci*  
683 **127**, 1263-1278 (2014).
- 684 41. Polymenidou, M. *et al.* Long pre-mRNA depletion and RNA missplicing  
685 contribute to neuronal vulnerability from loss of TDP-43. *Nat Neurosci* **14**,  
686 459-468 (2011).
- 687 42. Sephton, C.F. *et al.* Identification of neuronal RNA targets of  
688 TDP-43-containing ribonucleoprotein complexes. *J Biol Chem* **286**, 1204-1215  
689 (2011).

- 690 43. Tollervey, J.R. *et al.* Characterizing the RNA targets and position-dependent  
691 splicing regulation by TDP-43. *Nat Neurosci* **14**, 452-458 (2011).
- 692 44. Xiao, S. *et al.* RNA targets of TDP-43 identified by UV-CLIP are deregulated in  
693 ALS. *Mol Cell Neurosci* **47**, 167-180 (2011).
- 694 45. Melamed, Z. *et al.* Premature polyadenylation-mediated loss of stathmin-2 is a  
695 hallmark of TDP-43-dependent neurodegeneration. *Nat Neurosci* **22**, 180-190  
696 (2019).
- 697 46. Ling, J.P., Pletnikova, O., Troncoso, J.C. & Wong, P.C. TDP-43 repression of  
698 nonconserved cryptic exons is compromised in ALS-FTD. *Science* **349**, 650-655  
699 (2015).
- 700 47. Alami, N.H. *et al.* Axonal transport of TDP-43 mRNA granules is impaired by  
701 ALS-causing mutations. *Neuron* **81**, 536-543 (2014).
- 702 48. Bergamin, G., Cieri, D., Vazza, G., Argenton, F. & Mostacciolo, M.L.  
703 Zebrafish Tg(hb9:MTS-Kaede): a new in vivo tool for studying the axonal  
704 movement of mitochondria. *Biochim Biophys Acta* **1860**, 1247-1255 (2016).
- 705 49. Wang, P. *et al.* TDP-43 induces mitochondrial damage and activates the  
706 mitochondrial unfolded protein response. *PLoS Genet* **15**, e1007947 (2019).
- 707 50. Vogler, T.O. *et al.* TDP-43 and RNA form amyloid-like myo-granules in  
708 regenerating muscle. *Nature* **563**, 508-513 (2018).
- 709 51. Laferriere, F. *et al.* TDP-43 extracted from frontotemporal lobar degeneration  
710 subject brains displays distinct aggregate assemblies and neurotoxic effects  
711 reflecting disease progression rates. *Nat Neurosci* **22**, 65-77 (2019).
- 712 52. Kawamura, Y., Okazaki, H., O'Brien, P.C. & Dych, P.J. Lumbar motoneurons of  
713 man: I) number and diameter histogram of alpha and gamma axons of ventral  
714 root. *J Neuropathol Exp Neurol* **36**, 853-860 (1977).
- 715 53. Mittal, K.R. & Logmani, F.H. Age-related reduction in 8th cervical ventral  
716 nerve root myelinated fiber diameters and numbers in man. *J Gerontol* **42**, 8-10  
717 (1987).
- 718 54. Tomlinson, B.E. & Irving, D. The numbers of limb motor neurons in the human  
719 lumbosacral cord throughout life. *J Neurol Sci* **34**, 213-219 (1977).
- 720 55. Piasecki, M., Ireland, A., Jones, D.A. & McPhee, J.S. Age-dependent motor unit  
721 remodelling in human limb muscles. *Biogerontology* **17**, 485-496 (2016).
- 722 56. Telerman-Toppet, N. & Coers, C. Motor innervation and fiber type pattern in

- 723 amyotrophic lateral sclerosis and in Charcot-Marie-Tooth disease. *Muscle Nerve*  
724 **1**, 133-139 (1978).
- 725 57. Asakawa, K. *et al.* Genetic dissection of neural circuits by Tol2  
726 transposon-mediated Gal4 gene and enhancer trapping in zebrafish. *Proc Natl*  
727 *Acad Sci U S A* **105**, 1255-1260 (2008).
- 728 58. Asakawa, K., Abe, G. & Kawakami, K. Cellular dissection of the spinal cord  
729 motor column by BAC transgenesis and gene trapping in zebrafish. *Front*  
730 *Neural Circuits* **7**, 100 (2013).
- 731 59. Moreno-Mateos, M.A. *et al.* CRISPRscan: designing highly efficient sgRNAs  
732 for CRISPR-Cas9 targeting in vivo. *Nat Methods* **12**, 982-988 (2015).
- 733 60. Asakawa, K. & Kawakami, K. A transgenic zebrafish for monitoring in vivo  
734 microtubule structures. *Dev Dyn* **239**, 2695-2699 (2010).

735

736

## 737 **Figure legends**

### 738 **Figure 1**

#### 739 **Overexpression of TDP-43 halts axon outgrowth independently of cytoplasmic**

740 **TDP-43 aggregation.** (A, B) CaPs (arrows) in Tg[SAIG213A] Tg[UAS:EGFP] fish.

741 Orange, black and grey arrowheads indicate dorsal and ventral limits of the spinal cord,  
742 and ventral myotomal borders, respectively. (C) CaPs in Tg[SAIG213A]

743 Tg[UAS:EGFP] (left) and Tg[SAIG213A] Tg[UAS:EGFP] Tg[UAS:mRFP1-TDP-43z]

744 (right) larvae at 48 hpf. The structure of Tg[UAS:mRFP1-TDP-43z] transgene (bottom).

745 (D) The lateral and frontal views of skeletonized CaP axons of Tg[SAIG213A]

746 Tg[UAS:EGFP] (left) and Tg[SAIG213A] Tg[UAS:EGFP] Tg[UAS:mRFP1-TDP-43z]

747 (right). The axon branch points and terminals are indicated by red and green,

748 respectively. (See also Sup Movie1). (E, F) Total length and branching frequency of

749 CaP axons at the spinal segment 14-17 of Tg[SAIG213A] Tg[UAS:EGFP] (green, 12

750 CaPs, 5 animals) and Tg[SAIG213A] Tg[UAS:EGFP] Tg[UAS:mRFP1-TDP-43z]

751 (magenta, 12 CaPs, 6 animals). \*,  $p < 0.0001$ . NS, Not statistically significant. (G)

752 Localization of mRFP1-TDP-43z in a CaP of Tg[SAIG213A] Tg[UAS:Gtuba2]

753 Tg[UAS:mRFP1-TDP-43z] at 48 hpf. EGFP-tagged $\alpha$ tubulin expressed from  
754 Tg[UAS:Gtuba2]<sup>60</sup> serves as a marker for cytoplasm. The bars indicate 20  $\mu$ m (B, C),  
755 40  $\mu$ m (D), 2  $\mu$ m (G).

756

## 757 **Figure 2**

758 **A photo-switchable TDP-43: opTDP-43.** (A) The structures of  
759 Tg[UAS:mRFP1-CRY2olig] and Tg[UAS:opTDP-43z]. (B) Tg[SAIG213A]  
760 Tg[UAS:mRFP1-CRY2olig] fish at 30 hpf. A montage of a CaP expressing  
761 mRFP1-CRY2olig (boxed). The blue light was illuminated from 0 to 30 min. (C)  
762 Tg[SAGFF73A] Tg[UAS:opTDP-43z] fish at 28 hpf (0 min) and 31.5 hpf (210 hpf). A  
763 montage of a skeletal muscle cell expressing opTDP-43z (dashed box). The blue light  
764 was illuminated from 0 to 210 min. (D, E) The averaged change of opTDP-43 intensity  
765 in the cytoplasm (D) and nucleus (E) during the illumination (N = 8 cells). The asterisks  
766 indicate the emergence of statistically significant change in opTDP-43 fluorescence  
767 intensity in comparison to the opTDP-43 level at t = 0 (p < 0.05, t test). (F)  
768 Immunofluorescence of the skeletal muscle of the fish illuminated for 3.5 hours, using  
769 anti-RFP antibody (for opTDP-43) and anti-ubiquitin antibodies. Arrows indicate the  
770 representative of opTDP-43 droplets that are partially ubiquitinated. N, nucleus. The  
771 bars indicate 500 bp (A), 20  $\mu$ m (B, C left), 10  $\mu$ m (C right), and 2  $\mu$ m (F).

772

## 773 **Figure 3**

774 **Light illumination-dependent cytoplasmic mislocalization of opTDP-43 in neuronal**  
775 **cells.** (A) The dorsal view of the spinal cord at the segment 14 -17 levels of a  
776 Tg[SAIG213A] Tg[mnr2b-hs:Gal4] Tg[UAS:opTDP-43z] Tg[UAS:EGFP] quadruple  
777 transgenic fish. Two spinal motor neurons (M1 and M2) and a Rohon-Beard sensory  
778 neuron (RB cell, S) highlighted with dashed boxes were analyzed in detail in B and C.  
779 (B, C) A montage of two spinal motor neurons (M1 and M2 in A) and a RB cell during  
780 the light illumination. The graphs show the fluorescent intensities of opTDP-43 along

781 the dotted line drawn from the lateral (L) to medial edge (M) of the EGFP signal. The  
782 blue arrows indicate the cytoplasmic increase of opTDP-43. The bars indicate 20  $\mu\text{m}$   
783 (A), 10  $\mu\text{m}$  (B).

784

#### 785 **Figure 4**

786 **The light-dependent transient cytoplasmic mislocalization of opTDP-43z is**  
787 **accompanied by diminished motor axon outgrowth.** (A) The light-illumination

788 paradigm of CaPs. The spinal cord of Tg[SAIG213A] Tg[UAS:opTDP-43z]  
789 Tg[UAS:EGFP] fish at the spinal segment 13-18 level were illuminated with a blue  
790 laser, and CaPs were subjected to morphological analysis at 48-50 hpf. Shown images  
791 are a single CaP from dorsal (28 and 31 hpf) and lateral (48 hpf) views. The

792 fluorescence intensity along the longest inner diameter (dashed magenta line) is plotted  
793 at each time point. Blue arrows indicate the presumptive cytoplasm area, where the  
794 opTDP-43z signal is faint. (B) Cytoplasmic shift of opTDP-43 localization is evaluated  
795 as a relative value of minimal ( $F_{\text{min}}$ , cytoplasm) and maximal ( $F_{\text{max}}$ , nuclear)

796 fluorescence intensity along the longest inner diameter (dashed magenta line). The  
797 results were obtained from 32 cells (28 and 31 hpf) and 17 cells (48 hpf) in three  
798 independent Tg[SAIG213A] Tg[UAS:opTDP-43z] Tg[UAS:EGFP] fish. \*  $p < 0.0001$  (t  
799 test). (C) CaP motor axons with (BL) or without (Dark) blue light stimulation. (D, E)

800 The total axon length and branching frequency of CaP motor axons in Tg[SAIG213A]  
801 Tg[UAS:EGFP] fish raised under normal laboratory light-dark cycle (L/D, the  
802 overlapping data sets with Figure 1E, F), Tg[SAIG213A] Tg[UAS:opTDP-43z]  
803 Tg[UAS:EGFP] fish with (BL, 15 cells, 4 animals) or without (Da, 15 cells, 4 animals)

804 blue light stimulation, and Tg[SAIG213A] Tg[UAS:mRFP1-CRY2olig]  
805 Tg[UAS:EGFP] fish with the blue light stimulation (7 cells, 2 animals). \*\*  $p = 0.0068$  (t  
806 test). NS, not significant. (I, J) Somas of the CaPs (arrowhead) and other

807 *mnr2b*-positive spinal motor neurons in the spinal segment 14 (I) and 13-17 (J) of  
808 Tg[SAIG213A] Tg[UAS:opTDP-43z] Tg[mnr2b-hs:EGFP-TDP43z] fish that was

809 illuminated with a blue light during 28 hpf- 32 hpf. (K, L) Evaluation of cytoplasmic  
810 shift of opTDP-43z and EGFP-TDP-43z in the CaP in I. (K) The fluorescence  
811 intensities of opTDP-43z (magenta) and EGFP-TDP-43z (green) was plotted along the  
812 blue dashed arrows. Images shown are over enhanced for identification of soma outline.  
813 (L) The relative intensity of cytoplasmic signal ( $F_{min}/F_{max}$ ) for opTDP-43z (magenta)  
814 and for EGFP-TDP-43z (green) in each spinal segment. The bars indicate 5  $\mu\text{m}$  (A, B),  
815 20  $\mu\text{m}$  (C, J), 10  $\mu\text{m}$  (I).

816

### 817 **Figure 5**

#### 818 **Axonal shrinkage and myofiber denervation caused by light stimulation of** 819 **opTDP-43z.**

820 (A) A CaP motor axon in Tg[SAIG213A] Tg[UAS:EGFP] fish. DCCT (green box) was  
821 magnified on the right. Primary, secondary and tertial branchings were indicated in red.  
822 (B) Light-illumination paradigm. (C, D, E) Total length (C), growth rate (D) and  
823 population change in axon terminal number (E) of DCCTs in Tg[SAIG213A]  
824 Tg[UAS:EGFP] Tg[UAS:opTDP-43z] fish (Dark: 29 cells, 5 animals, BL: 18 cells, 3  
825 animals) and Tg[SAIG213A] Tg[UAS:EGFP] fish raised under normal dark light  
826 cycles (D/L: 17 cells, 3 animals). \*,  $p = 0.0224$  (t test). (F) The lateral view of the trunk  
827 of Tg[SAIG213A] Tg[UAS:V2V] Tg[actc1b:tdT-chrnd] fish (left) and neuromuscular  
828 synapses of the DCCT (right) at 56 hpf. The dashed yellow lines indicate the CaP axon  
829 shaft. (G) Neuromuscular synapses of the DCCT in Tg[SAIG213A]  
830 Tg[UAS:opTDP-43z] Tg[UAS:V2V] Tg[actc1b:tdT-chrnd] fish at 56 hpf. (H, I) Live  
831 imaging of DCCT neuromuscular synapses. Yellow arrowheads indicate the  
832 neuromuscular synapses that were not present at 72 hpf. The yellow dashed lines, dots,  
833 arrows indicate axon shafts, primary branching points, and contact sites with the  
834 myotomal boundaries of CaPs, respectively. In I, Z-stacks are produced from  
835 3D-rotated images made by Imaris, to make the denervation events (arrowhead) clearly  
836 visible. The bars indicate 10  $\mu\text{m}$  (A top, F right), 50  $\mu\text{m}$  (A bottom, F left), 5 $\mu\text{m}$  (H).

837

838 **Figure 6**

839 **Long-term light stimulation of opTDP-43h induces TDP-43 aggregation that seeds**  
840 **non-optogenetic TDP-43 aggregation**

841 (A) Chronic field illumination of unrestrained larvae from 2 dpf -5 dpf. (B, C) Live  
842 imaging of the spinal motor column of Tg[mnr2b-hs:EGFP-TDP43z]  
843 Tg[mnr2b-hs:opTDP-43h] (B) and Tg[mnr2b-hs:EGFP-TDP43z]  
844 Tg[mnr2b-hs:opTDP-43h<sup>A315T</sup>] (C) fish from 2 - 5 dpf. (D) Chronically light-stimulated  
845 opTDP-43h (left) and opTDP-43h<sup>A315T</sup> (right) aggregates in the cytoplasm and seed  
846 EGFP-TDP-43z aggregation. Arrowheads indicate opTDP-43 and opTDP-43h<sup>A315T</sup>  
847 aggregates that contain EGFP-TDP-43z. (E) RT-PCR analysis for opTDP-43h  
848 (opT43h) and opTDP-43h<sup>A315T</sup> (A315T). cDNA samples were extracted from  
849 Tg[mnr2b-hs:EGFP-TDP43z] (none), Tg[mnr2b-hs:EGFP-TDP43z]  
850 Tg[mnr2b-hs:opTDP-43h] (opT43h), and Tg[mnr2b-hs:EGFP-TDP43z]  
851 Tg[mnr2b-hs:opTDP-43h<sup>A315T</sup>] (A315T) larvae at 72hpf. EGFP and zfan5b are internal  
852 controls. (F, G, H) Longitudinal single cell analyses of opTDP-43h or opTDP-43h<sup>A315T</sup>  
853 fluorescence intensity (RFP) relative to EGFP-TDP-43z (GFP) (64 cells from 4 animals,  
854 for each). \* p < 0.001 (t test). \*\* p = 0.03 (t test). (I) Failure rate of swimming bladder  
855 (SB) inflation of Tg[mnr2b-hs:EGFP-TDP43z] (none), Tg[mnr2b-hs:EGFP-TDP43z]  
856 Tg[mnr2b-hs:opTDP-43h] (opT43h), and Tg[mnr2b-hs:EGFP-TDP43z]  
857 Tg[mnr2b-hs:opTDP-43h<sup>A315T</sup>] (A315T) larvae at 5 dpf. Figures indicate the number of  
858 illuminated fish examined. SB inflation failure was not observed when fish were raised  
859 under normal dark light cycles (N > 100 for each). The bars indicates 20  $\mu$ m (B) and 5  
860  $\mu$ m (D).

861

862 **Figure 7**

863 **Sequentially regulated illumination-triggered TDP-43 Knot and Aggregate**  
864 **formation**

865 In physiological conditions, TDP-43 forms oligomers via its N-terminus and is  
866 primarily localized in the nucleus. Spinal motor neurons keep cytoplasmic concentration  
867 of TDP-43 oligomers at a low level to prevent them from turning into toxic irreversible  
868 oligomers mediated by the C-terminus IDRs (toxic “knots”), which possess competence  
869 for developing into pathological TDP-43 aggregates, a hallmark of ALS.  
870 CRY2olig-driven opTDP-43 oligomerization promotes pathological change of the  
871 motor neurons, such as axon retraction associated with myofiber denervation, prior to  
872 accumulation of distinct cytoplasmic aggregates. Whether CRY2olig-diriven opTDP-43  
873 aggregates are toxic to the motor neurons and whether CRY2olig-diriven aggregates  
874 eventually deplete endogenous nuclear TDP-43 pools are unknown.

875

## 876 **Supplementary Figure 1**

### 877 **Functional validation of opTDP-43z using TDP-43 knockout fish.**

878 (A) The structure of human and zebrafish Tardbp/TDP-43 proteins. RRM,  
879 RNA-recognition motif. IDR, Intrinsically disordered region (B, C) The *tardbp-n115*  
880 and *tardbpl-n94* mutations are frame-shift deletions that cause protein truncation. The  
881 deleted nucleotides were indicated by red lower cases. The grey bars indicate  
882 ectopically added peptide due to the frame shift. (D) The lateral views of the wild type  
883 (top) and double homozygous (bottom) larvae at 48 hpf. The arrow and arrowhead  
884 indicate the swollen heart and the stacked red blood cells on the far side of the yolk,  
885 respectively. (E) Rescue rate of the blood circulation defect of the *tardbp-n115*  
886 *tardbpl-n94* homozygotes (DKOs). The numbers on the histograms show the total  
887 numbers of DKOs investigated obtained from three independent microinjection  
888 experiments for each TDP-43 construct.

889

## 890 **Supplementary Figure 2**

### 891 **Whole-body overexpression of mRFP1-TDP-43z is toxic to zebrafish.**



892 The lateral view of Tg[SAGFF73] (top) and Tg[SAGFF73] Tg [UAS:mRFP1-TDP-43z]  
893 (bottom) embryos at 24 hpf. The RFP signal is shown in the right panel.

894

### 895 **Supplementary Figure 3**

#### 896 **Cell-type specificity of light-dependent cytoplasmic opTDP-43z mislocalization.**

897 (A) The nuclear-enriched opTDP-43z localization was not changed by the 3-hour blue  
898 light illumination in the embryonic epithelial cells. (B) opTDP-43z localization was not  
899 changed by the 4-hour blue light illumination in the differentiated skeletal muscle cells.  
900 Cytoplasmic opTDP-43 droplets were occasionally observed independently of light  
901 illumination. These light-insensitive opTDP-43 droplets were static throughout the  
902 experiment.

903

### 904 **Supplementary Movie 1**

905 The skeletonized CaP axons of Tg[SAIG213A] Tg[UAS:EGFP] (left) and  
906 Tg[SAIG213A] Tg[UAS:EGFP] Tg[UAS:mRFP1-TDP-43z] (right). The axon branch  
907 points and terminals are indicated by red and green, respectively.

908

### 909 **Supplementary Movie 2**

910 The lateral view of CaPs of Tg[SAIG213A] Tg[UAS:mRFP1-CRY2olig] double  
911 transgenic embryo. The blue light was illuminated from 0 to 30 min (indicated by a blue  
912 dot).

913

### 914 **Supplementary Movie 3**

915 Skeletal muscle cells expressing opTDP-43z opTDP-43z illuminated with blue light in  
916 in Tg[SAGFF73A] Tg[UAS:opTDP-43z] fish at 28 hpf.

917

### 918 **Supplementary Movie 4**

919 The dorsal view of the spinal cord at the segment 14 -17 levels of a Tg[SAIG213A]  
920 Tg[mnr2b-hs:Gal4] Tg[UAS:opTDP-43z] Tg[UAS:EGFP] quadruple transgenic fish.  
921 EGFP (left) and opTDP-43z (right) were presented side by side. The transverse planes  
922 for EGFP and opTDP-43z signals are not completely matched because they are  
923 independently registered using Image J software.

924

#### 925 **Supplementary Movie 5**

926 A Tg[mnr2b-hs:EGFP-TDP43z] Tg[mnr2b-hs:opTDP-43h<sup>A315T</sup>] (A315T) larva  
927 (focused) that had been illuminated with blue light during 2-5 dpf is lying at the bottom  
928 of the dish with normal heart beat but without the swim bladder inflation. Its sibling  
929 (Tg[mnr2b-hs:EGFP-TDP43z] larva) that experienced the same illumination procedure  
930 is capable of swimming freely with an inflated swim bladder. The movie is played in  
931 actual speed.

932

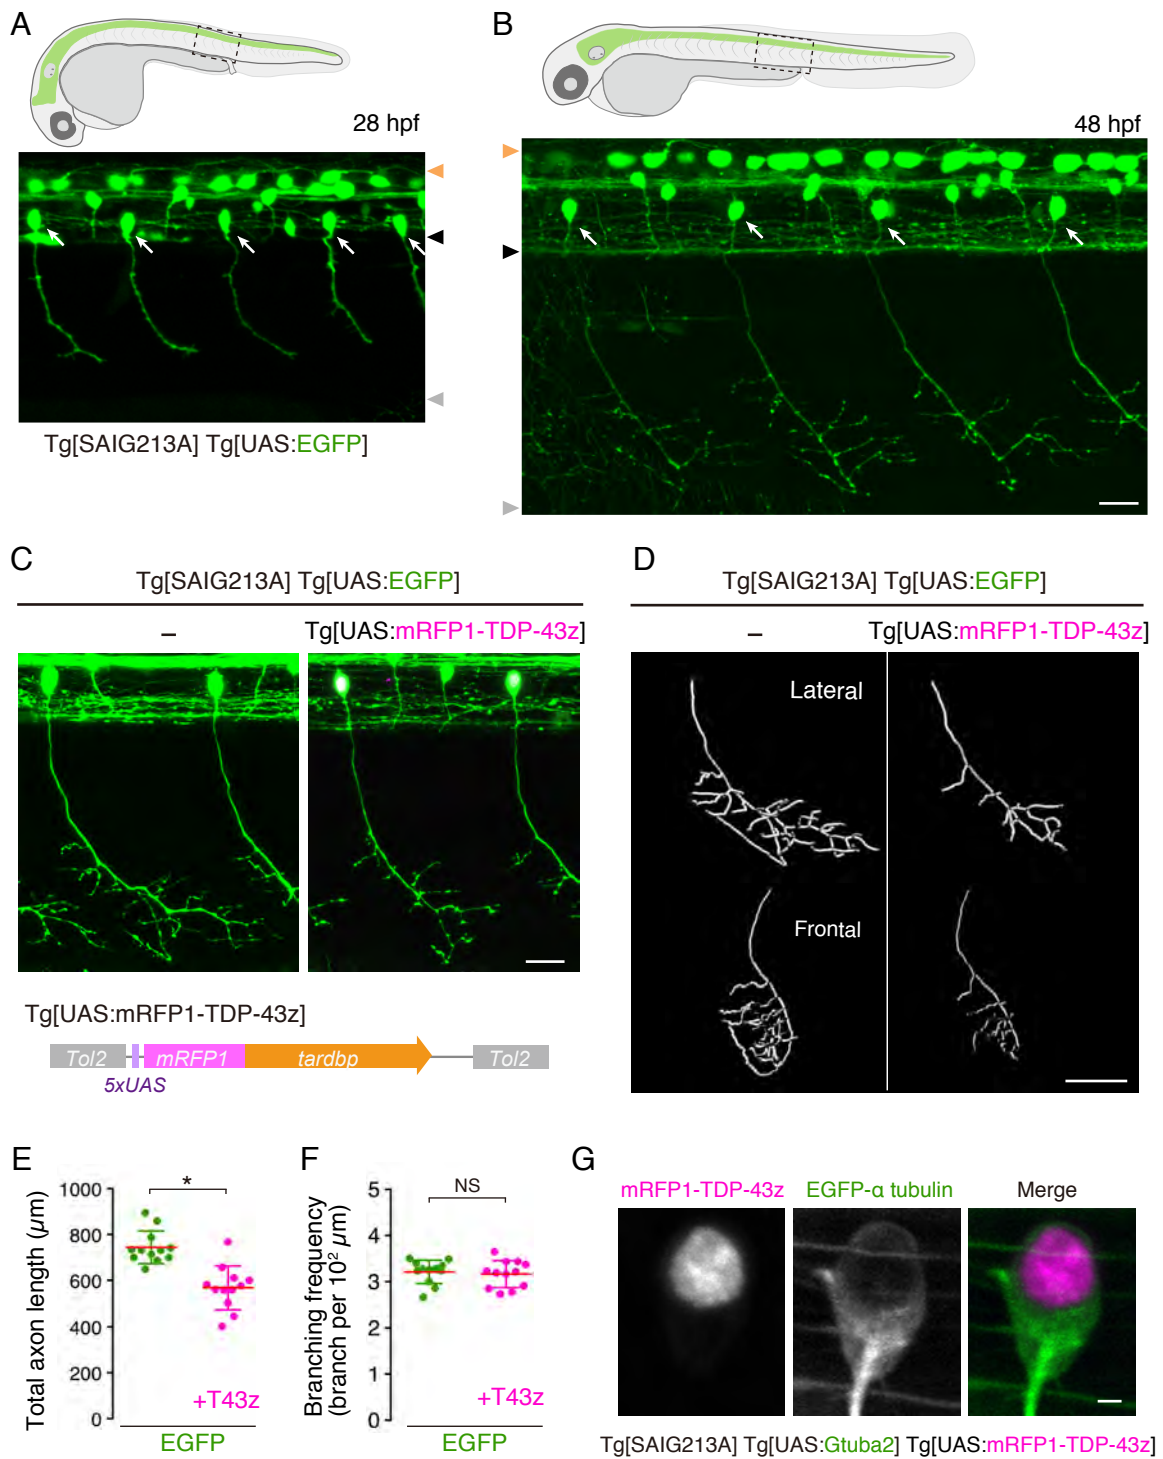

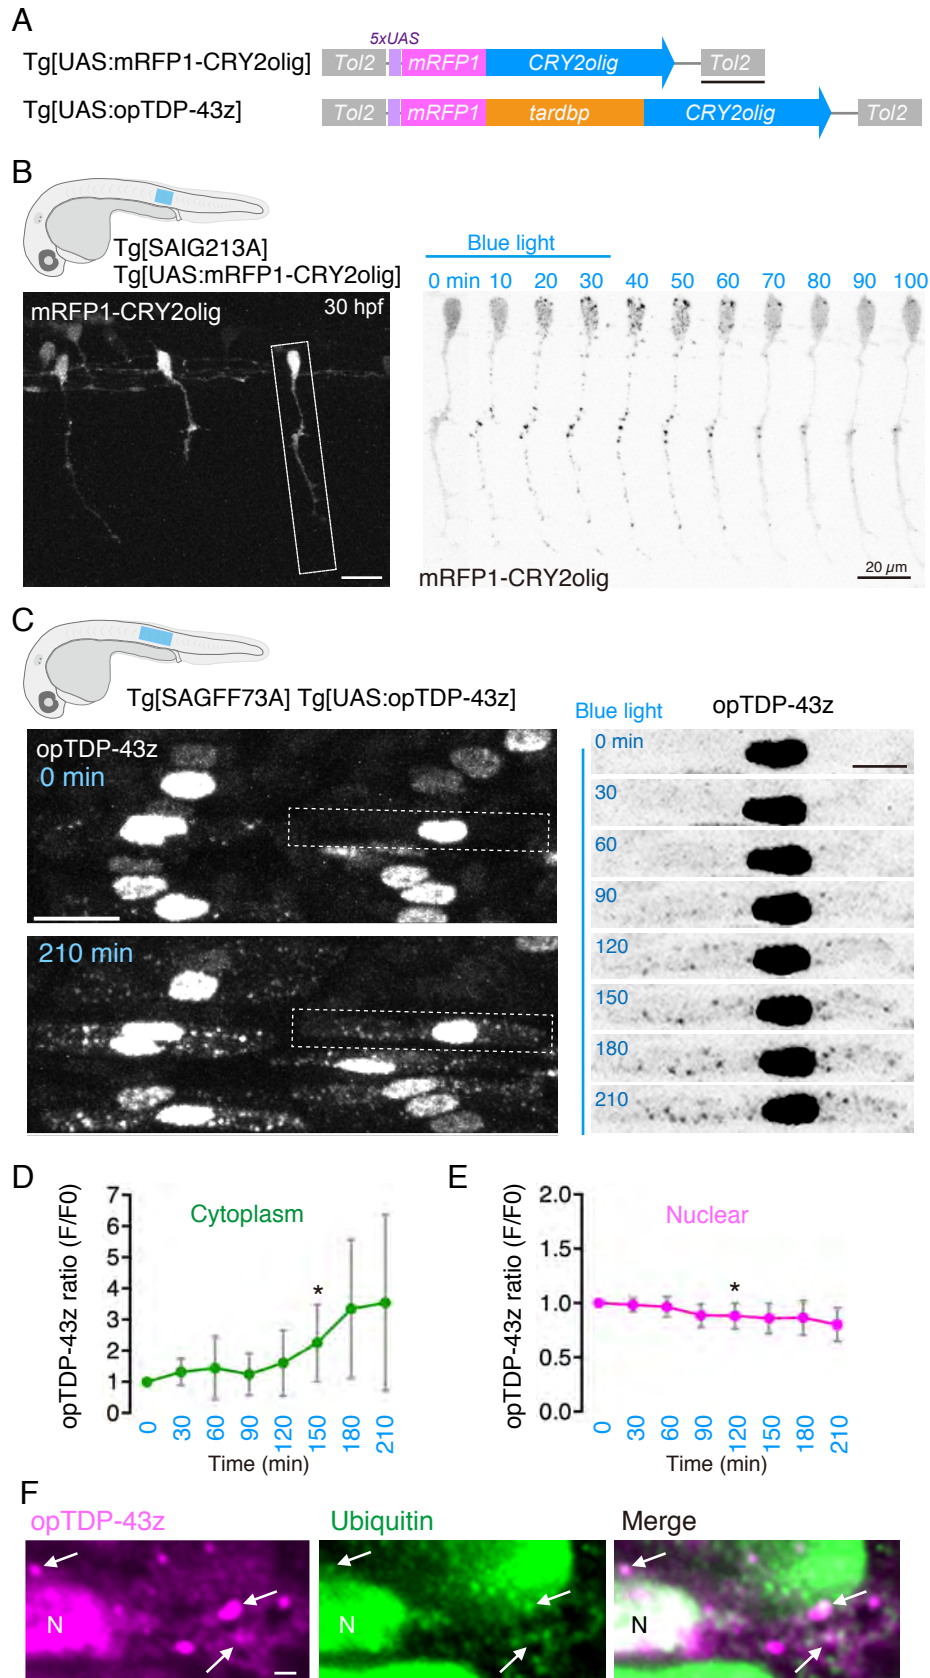

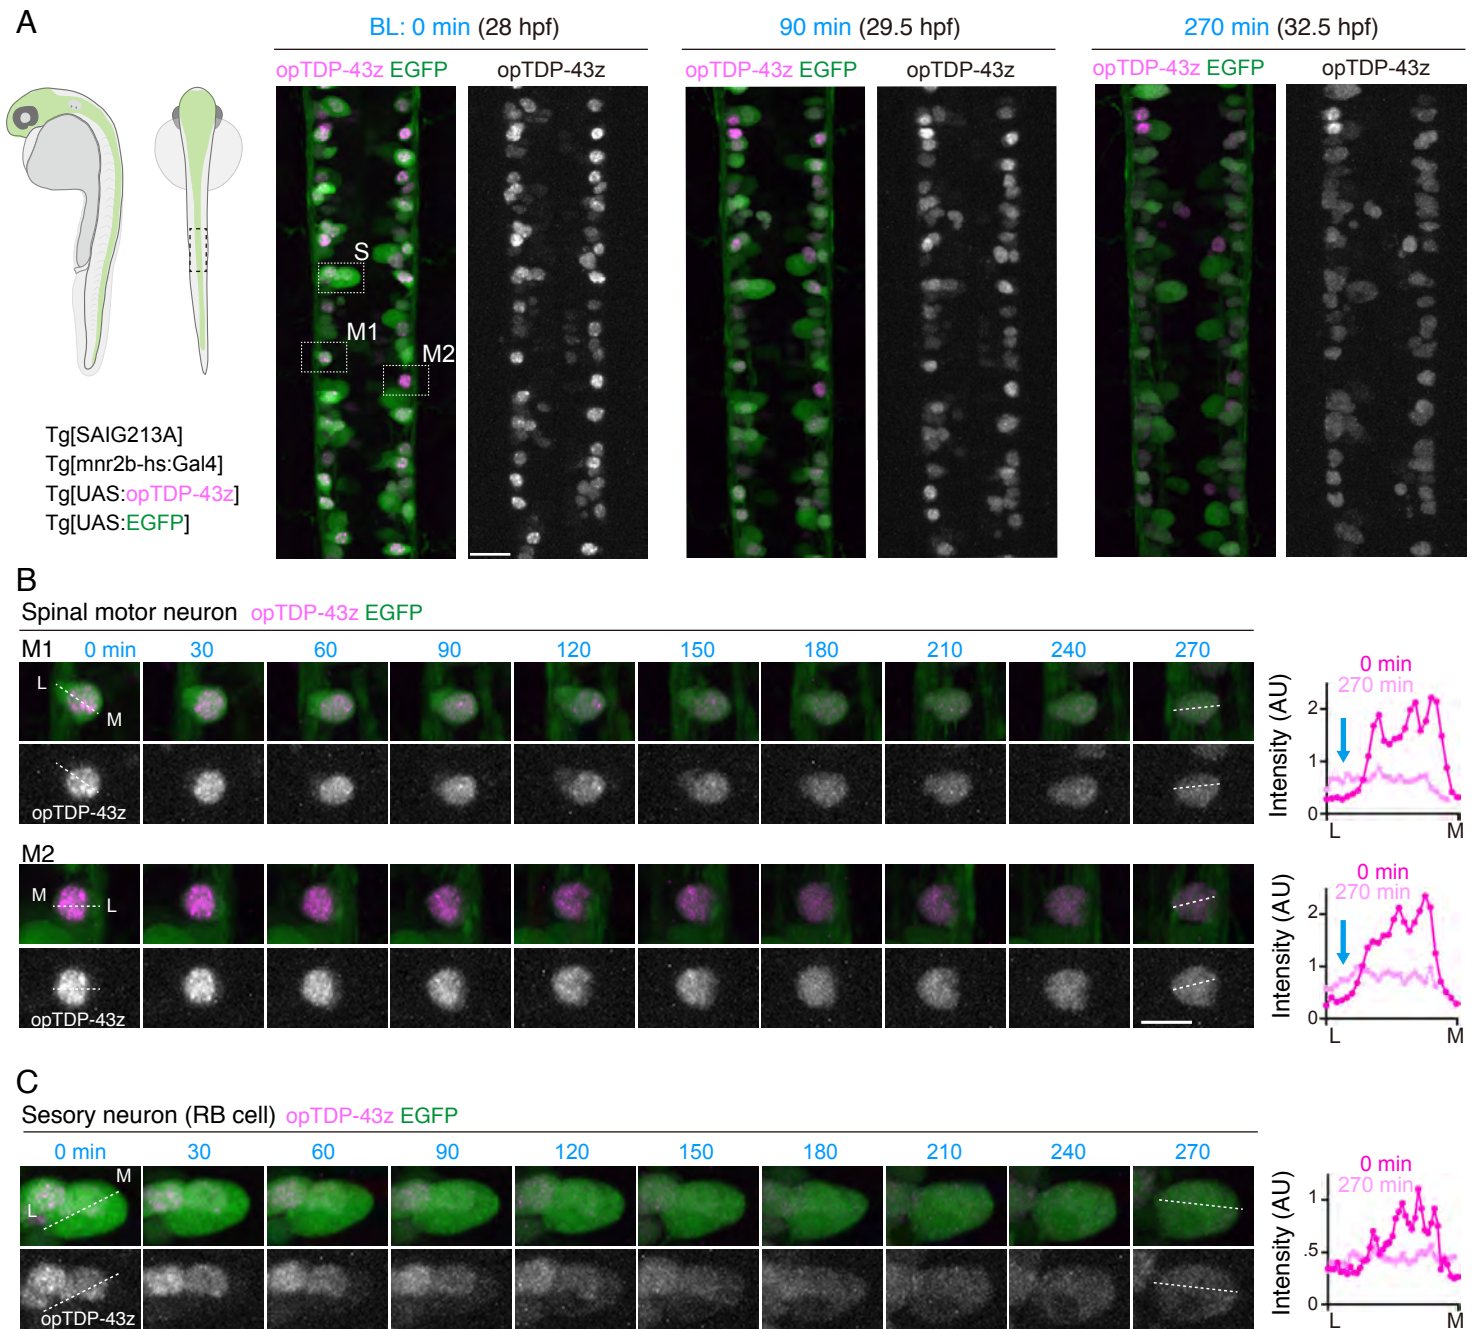

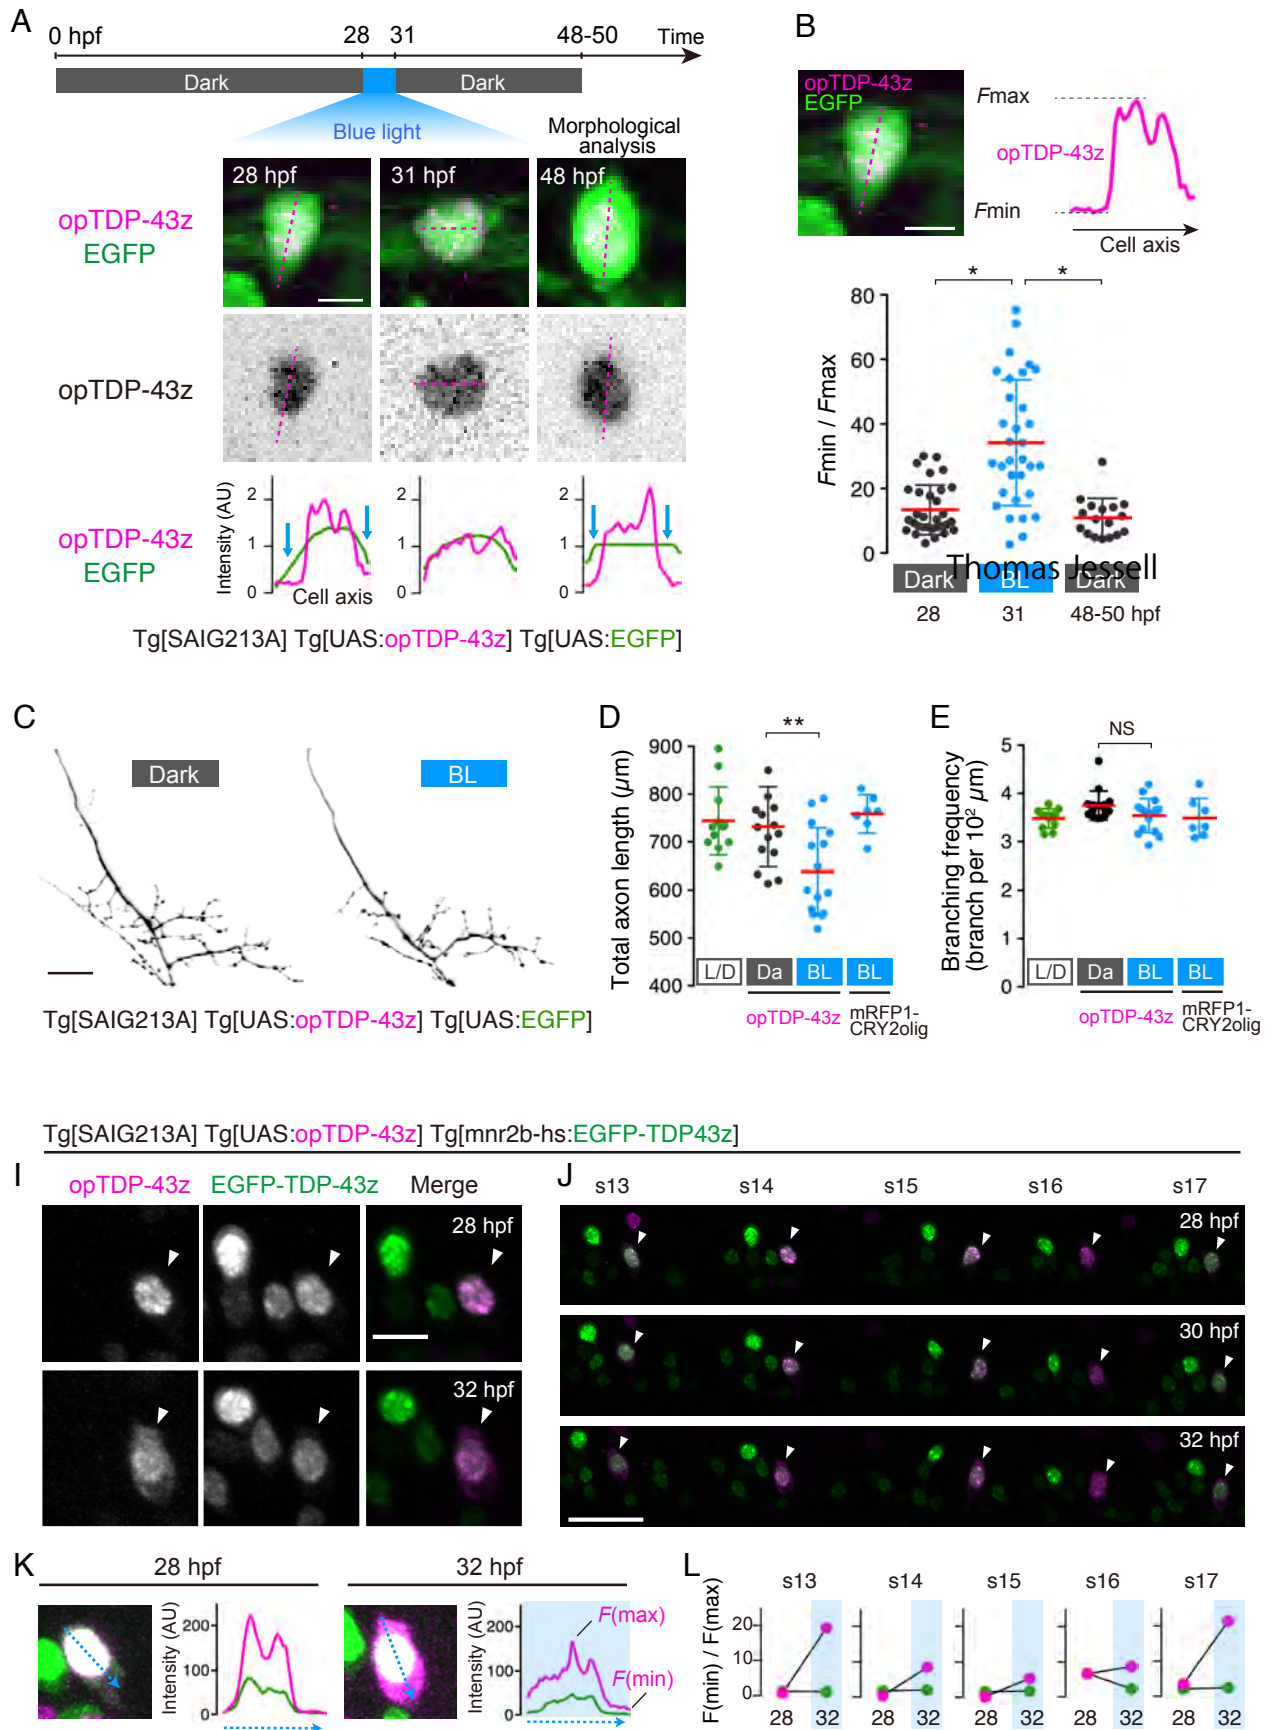

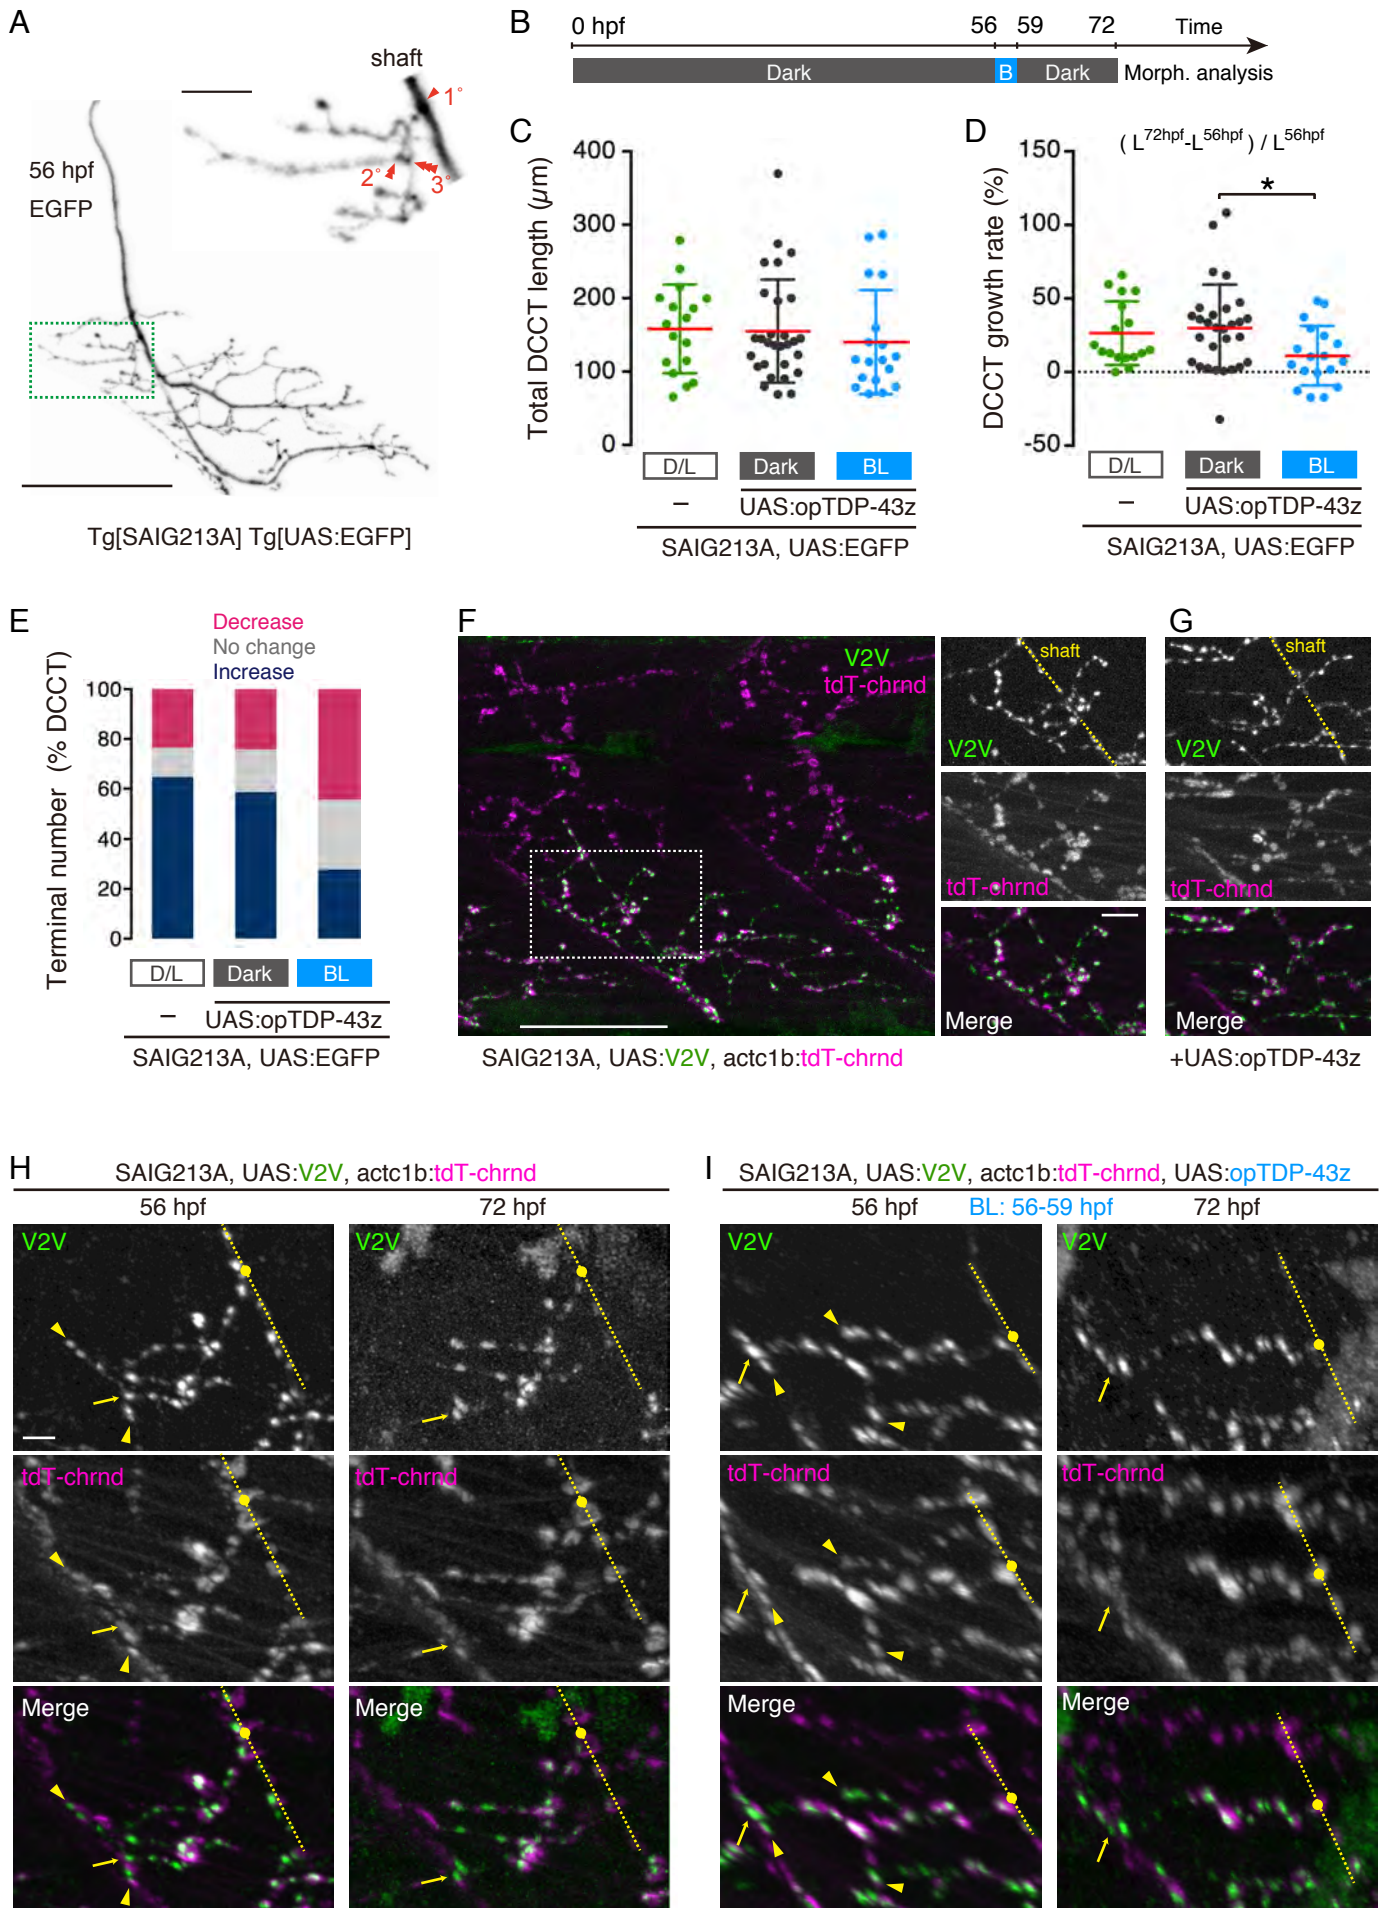

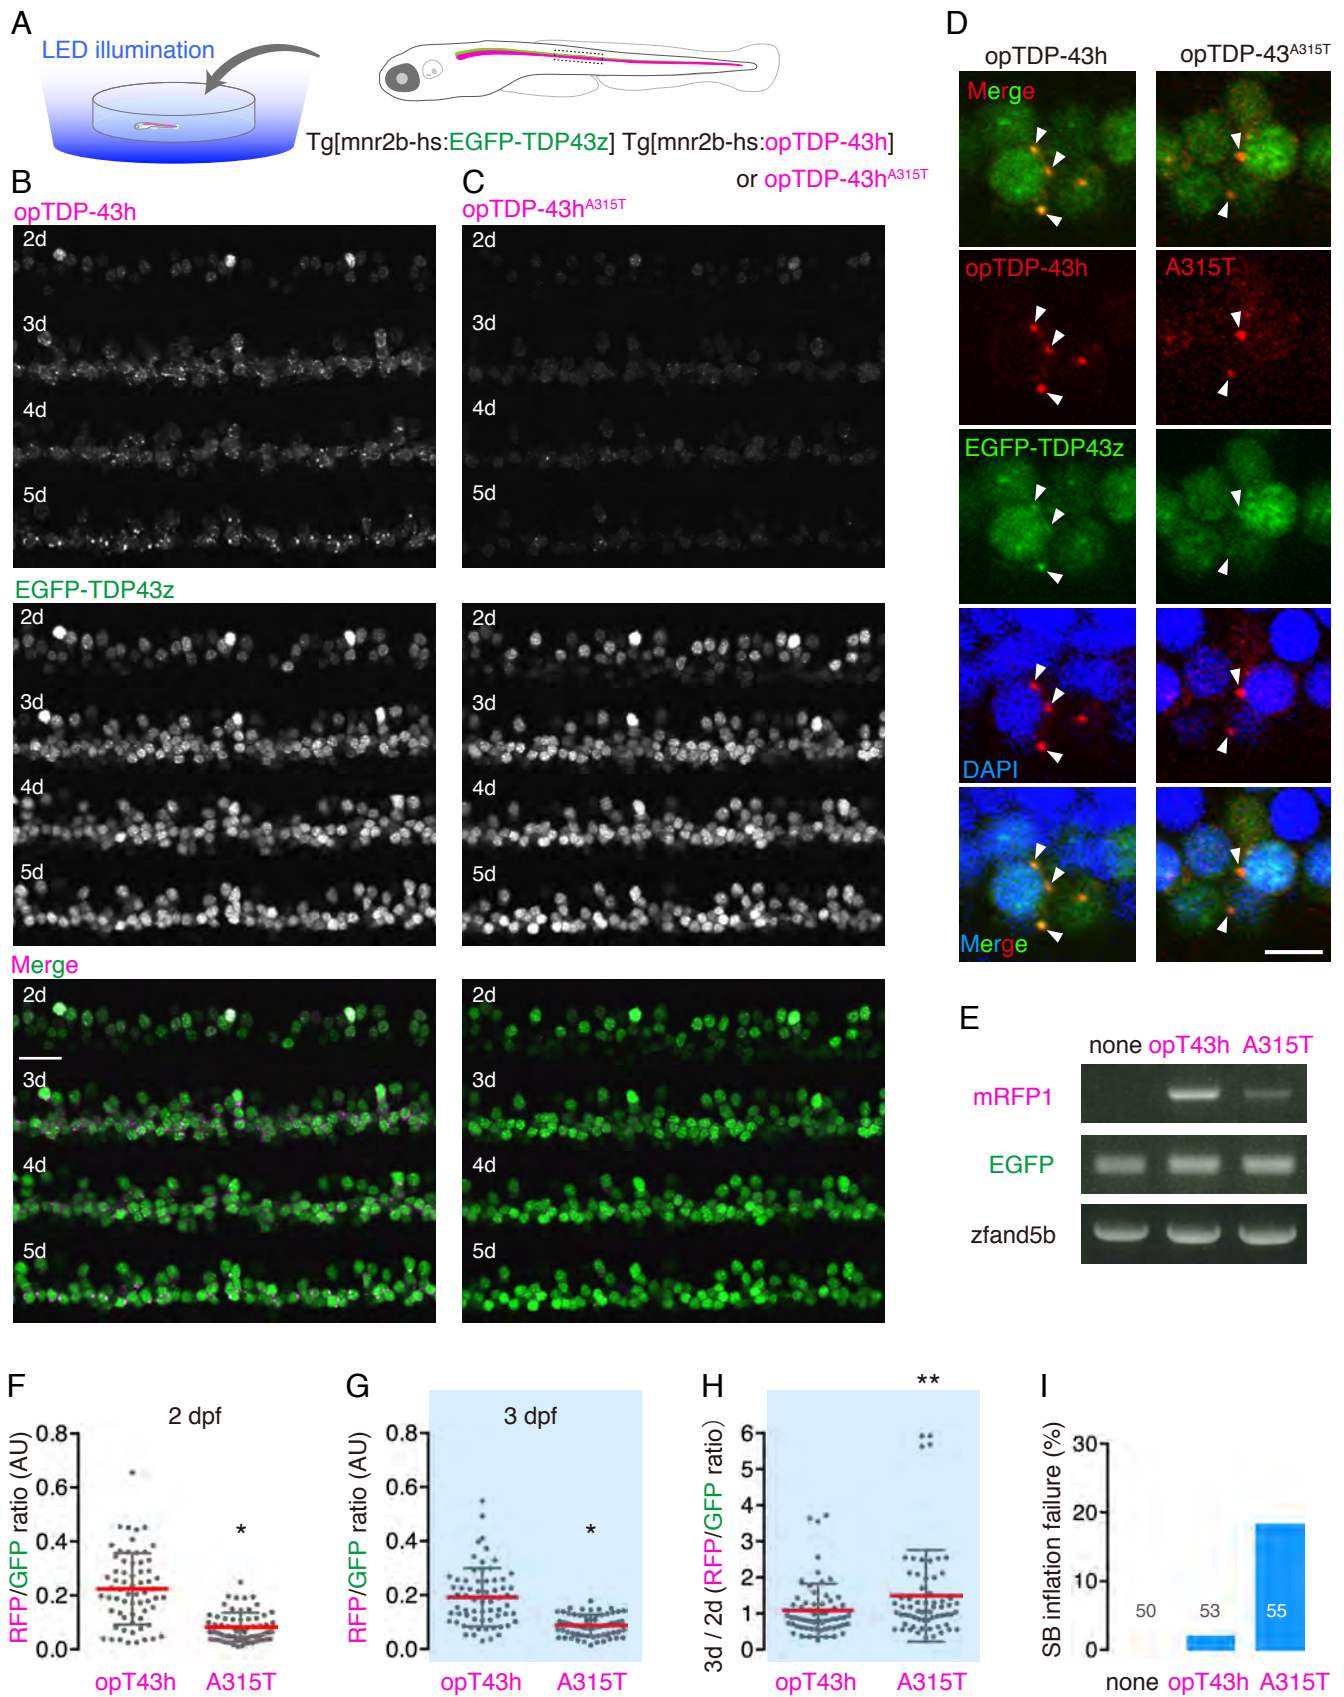



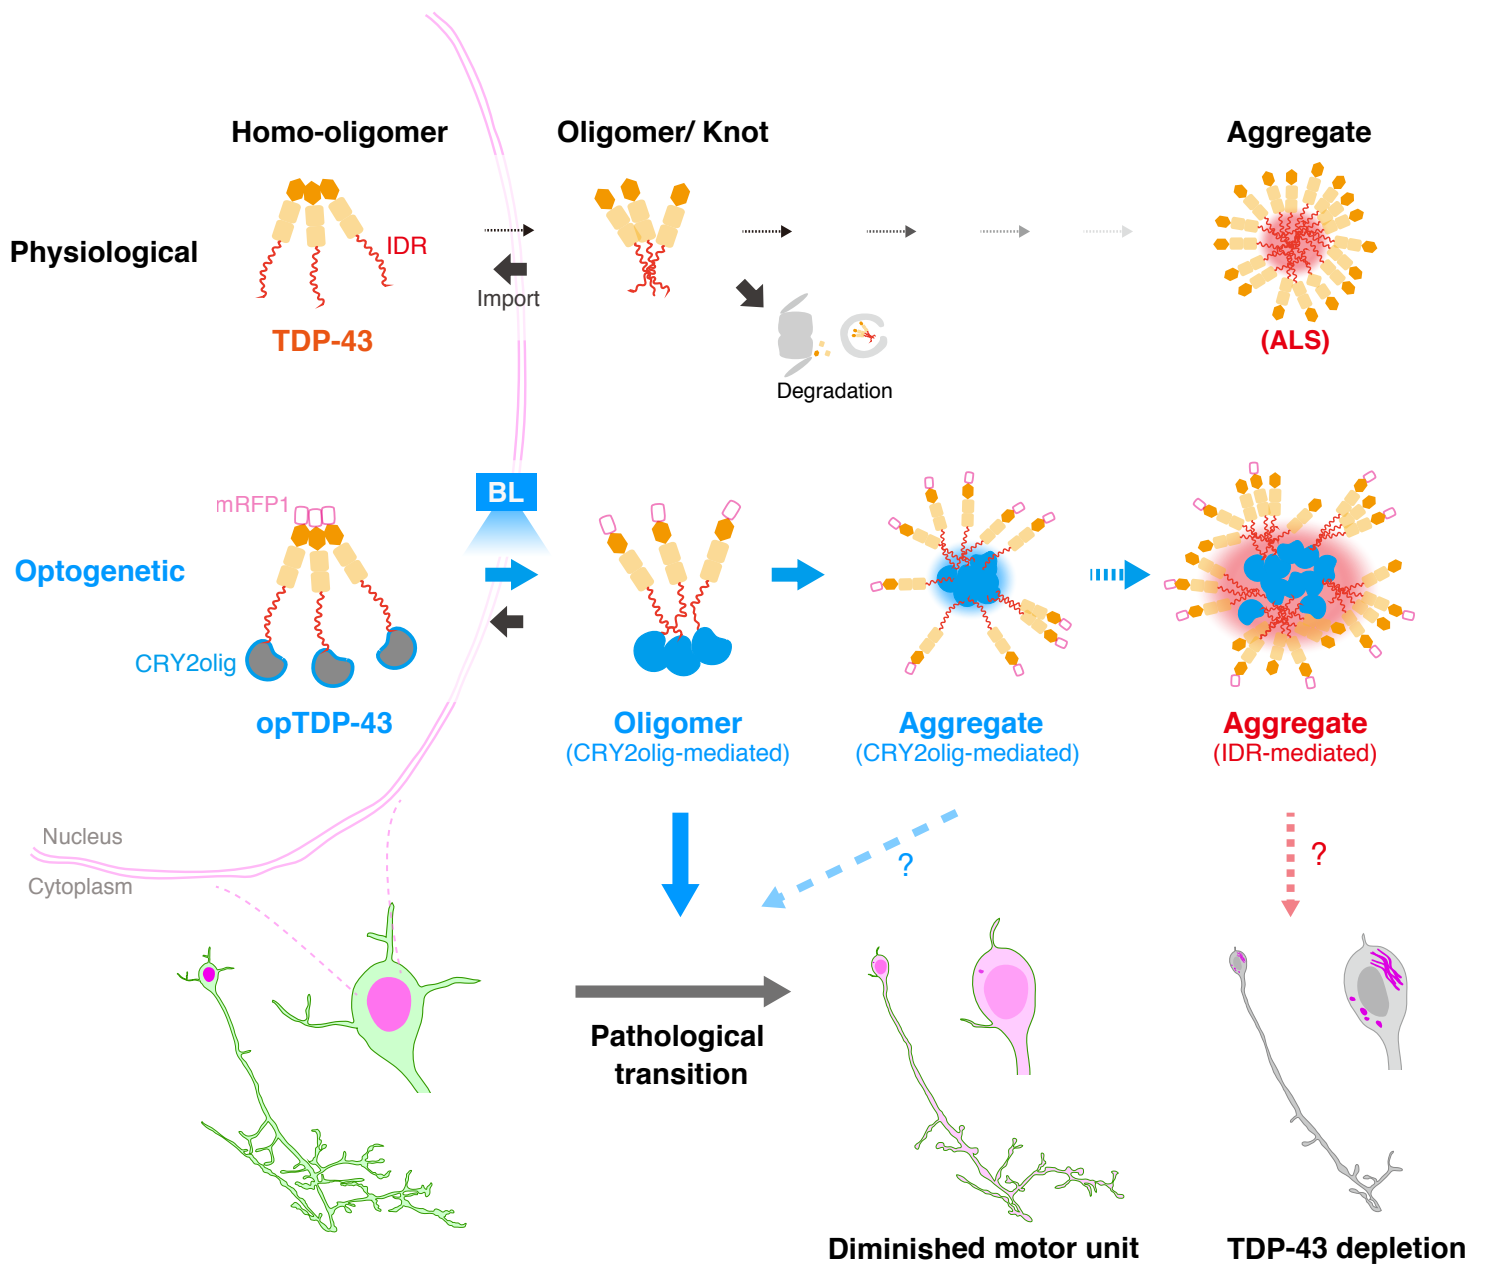

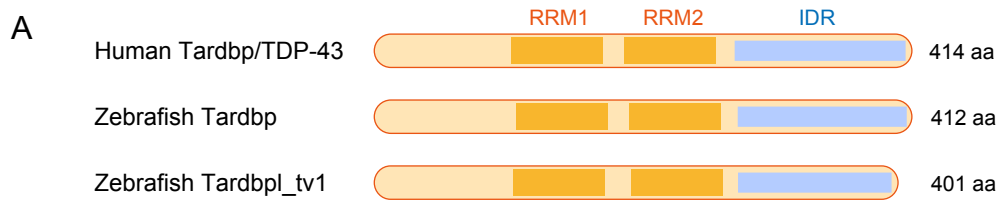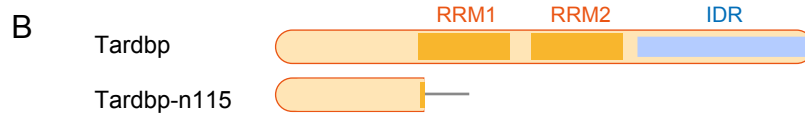

GTG CT [gggtctgcatggaagacttcagagcaagacttaaagactact] T CGG TAC ATT TGG  
 GGA AGT CAT CAT GGT GCA GGT CAA GCG GGA TGT GAA GAC AGG AAA  
 TTC AAA AGG GTT TGG CTT TGT GAG GTT TGG AGA CTG GGA GAC TCA  
 GAG TAA GGT ... (Deletion: 345~388)

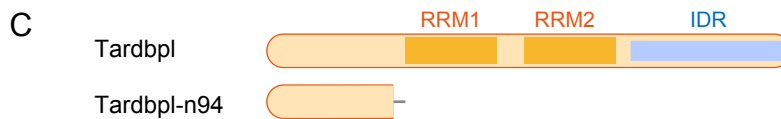

GCA TCG GC [ggtgaagatcaagaggggc] A TCC AGA AGA CAT CAG ATT TGA TTG ...  
 (Deletion: 282~300)

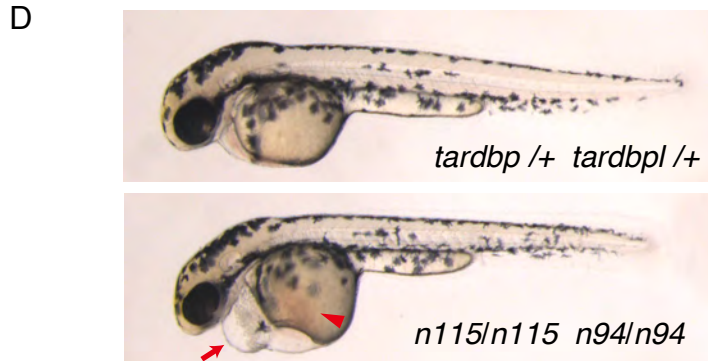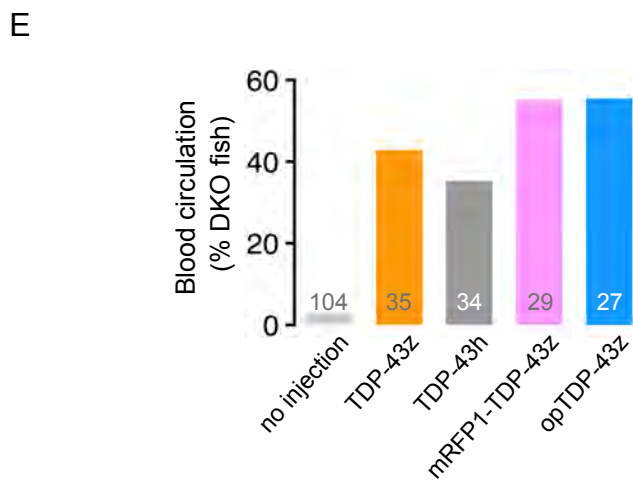

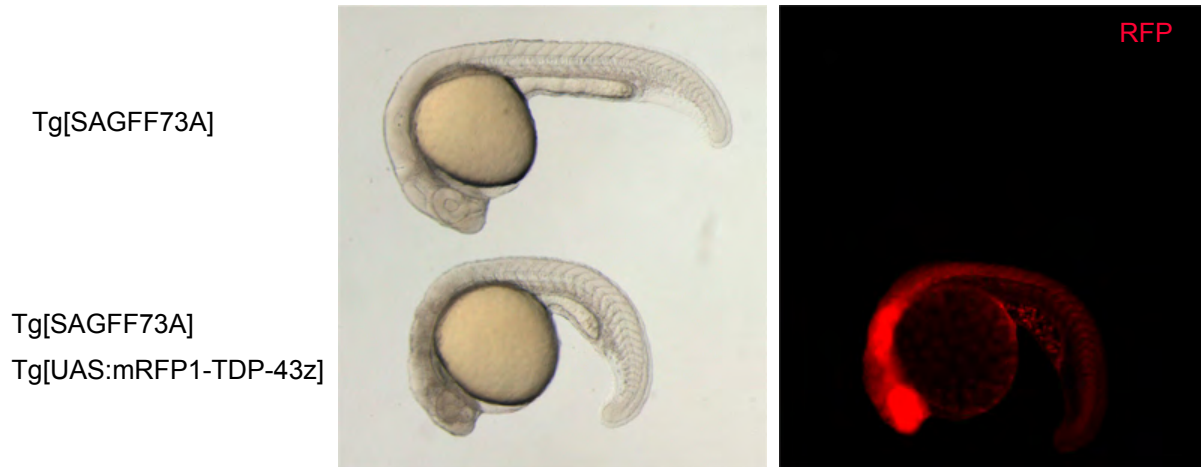

Asakawa et al. Figure S2

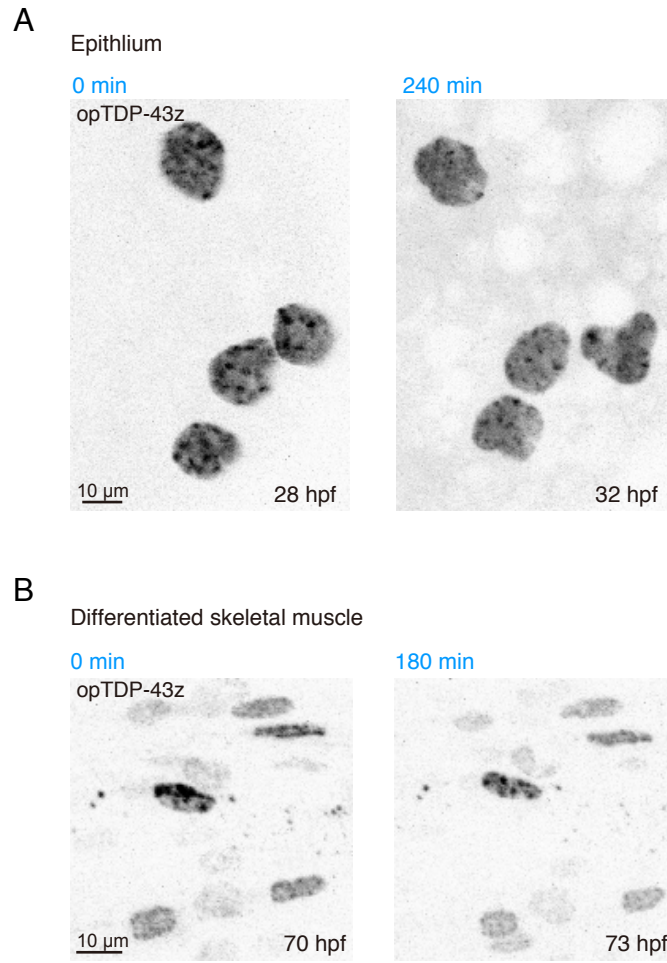

Asakawa et al. Figure S3
